# Supplementary material for: Microbial succession and exploration of higher alcohols-producing core bacteria in northern Huangjiu fermentation
Source: PubMed Central journal article supplement (PMC9206695; doi:10.1186/s13568-022-01418-6), 2022-06-18
Supplement: 13568_2022_1418_MOESM1_ESM.pdf [file 13568_2022_1418_MOESM1_ESM.pdf]

# **Microbial Succession and Higher Alcohols Production in Northern Huangjiu Fermentation**

Yi Yan<sup>1,2</sup>, Leping Sun<sup>1,2</sup>, Xuan Xing<sup>1,2</sup>, Huijun Wu<sup>1,2</sup>, Xin Lu<sup>3</sup>, Wei Zhang<sup>4</sup>, Jialiang  
Xu<sup>1,2\*</sup>, Qing Ren<sup>1,2\*</sup>

<sup>1</sup>School of Light Industry, Beijing Technology and Business University, Beijing,  
China

<sup>2</sup>Key Laboratory of Brewing Molecular Engineering of China Light Industry, Beijing  
100048, China

<sup>3</sup>State Key Laboratory for Infectious Disease Prevention and Control, National  
Institute for Communicable Disease Control and Prevention, Chinese Center for  
Disease Control and Prevention, Beijing, China

<sup>4</sup>College of Food Science and Technology, Hebei Agricultural University, Baoding,  
China

## **\* Correspondence:**

Jialiang Xu

xujialiang@btbu.edu.cn

Qing Ren

renqing@th.btbu.edu.cn

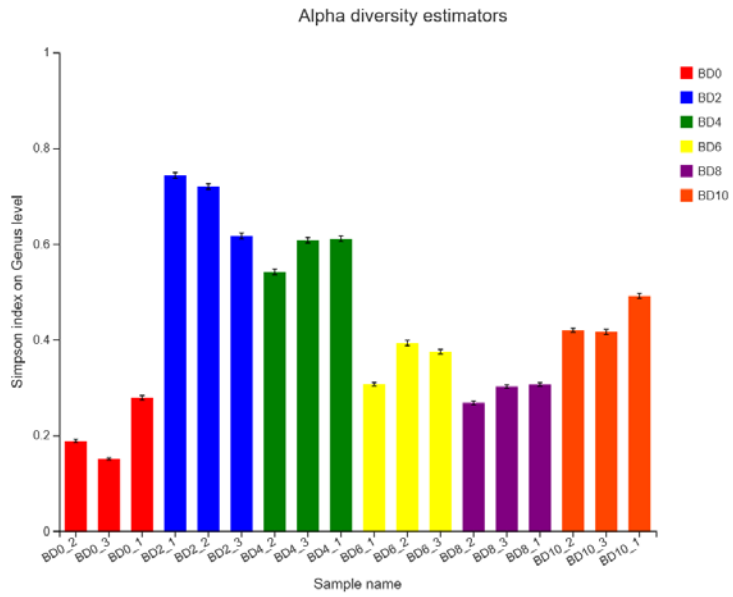

**Figure S1.** The fungal community diversity of the samples using alpha-diversity index.

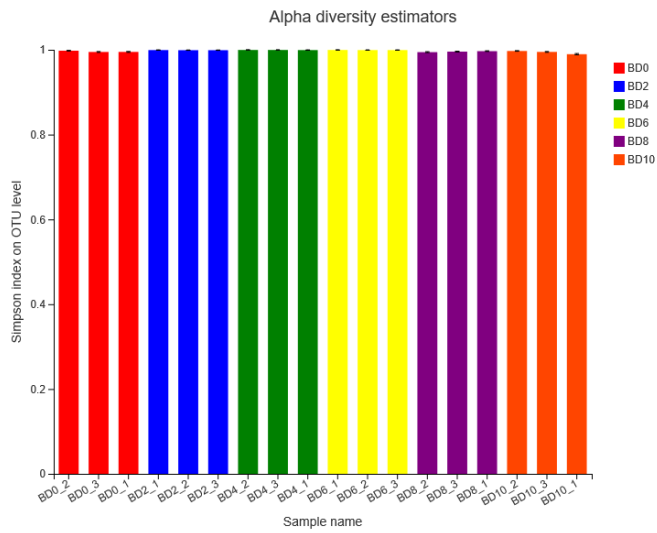

**Figure S2.** The bacterial community diversity of the samples using alpha-diversity index.

**Table S1.** The changes of alcohol, reducing sugar and acid during fermentation in northern Huangjiu.

|                             | <b>Day 0</b> | <b>Day 2</b> | <b>Day 4</b> | <b>Day 6</b> | <b>Day 8</b> | <b>Day 10</b> |
|-----------------------------|--------------|--------------|--------------|--------------|--------------|---------------|
| <b>Alcohol (%vol)</b>       | 0.000±0.000  | 6.520±0.347  | 11.646±0.962 | 12.132±0.408 | 12.298±0.303 | 12.584±0.345  |
| <b>Reducing sugar (g/L)</b> | 16.411±0.340 | 9.772±0.395  | 8.717±0.216  | 7.991±0.461  | 6.997±0.286  | 6.157±0.227   |
| <b>Acid (g/L)</b>           | 0.837±0.052  | 3.736±0.263  | 5.255±0.229  | 5.093±0.775  | 5.007±0.184  | 5.013±0.425   |

\*Every value was expressed as means standard error (n=3).

**Table S2.** The high-throughput sequencing of fungal diversity during the fermentation process in northern Huangjiu.

| <b>OTU ID</b>        | <b>Day0_1</b> | <b>Day0_2</b> | <b>Day0_3</b> | <b>Day2_1</b> | <b>Day2_2</b> | <b>Day2_3</b> | <b>Day4_1</b> | <b>Day4_2</b> | <b>Day4_3</b> |
|----------------------|---------------|---------------|---------------|---------------|---------------|---------------|---------------|---------------|---------------|
| <i>Aspergillus</i>   | 8             | 6             | 6             | 1             | 0             | 2             | 0             | 0             | 1             |
| <i>Malassezia</i>    | 1             | 1             | 1             | 0             | 0             | 2             | 1             | 4             | 2             |
| <i>Podosphaera</i>   | 0             | 0             | 1             | 0             | 0             | 0             | 0             | 0             | 0             |
| <i>Saccharomyces</i> | 30339         | 32705         | 33521         | 31238         | 37968         | 38401         | 34770         | 41404         | 38034         |
| <i>Thermoascus</i>   | 67            | 27            | 78            | 9             | 16            | 13            | 10            | 2             | 3             |

**Refer to Table S2 (continued)**

| <b>OTU ID</b>        | <b>Day6_1</b> | <b>Day6_2</b> | <b>Day6_3</b> | <b>Day8_1</b> | <b>Day8_2</b> | <b>Day8_3</b> | <b>Day10_1</b> | <b>Day10_2</b> | <b>Day10_3</b> |
|----------------------|---------------|---------------|---------------|---------------|---------------|---------------|----------------|----------------|----------------|
| <i>Aspergillus</i>   | 2             | 0             | 1             | 0             | 1             | 1             | 1              | 0              | 2              |
| <i>Malassezia</i>    | 0             | 1             | 0             | 3             | 1             | 1             | 3              | 1              | 1              |
| <i>Podosphaera</i>   | 0             | 0             | 0             | 0             | 0             | 0             | 3              | 0              | 0              |
| <i>Saccharomyces</i> | 34125         | 37213         | 38754         | 35604         | 37345         | 38521         | 34253          | 35150          | 37495          |
| <i>Thermoascus</i>   | 5             | 10            | 12            | 53            | 101           | 80            | 171            | 47             | 91             |





|                                                                                                                                               |    |    |    |   |   |   |   |   |   |   |    |   |    |    |    |   |   |    |
|-----------------------------------------------------------------------------------------------------------------------------------------------|----|----|----|---|---|---|---|---|---|---|----|---|----|----|----|---|---|----|
| <i>d__Bacteria;k__norank;p__Actinobacteria;c__Actinobacteria;o__Frankiales;f__Nakamurellaceae;g__Nakamurella</i>                              | 22 | 41 | 26 | 3 | 3 | 6 | 8 | 8 | 4 | 4 | 10 | 2 | 3  | 10 | 15 | 3 | 1 | 4  |
| <i>d__Bacteria;k__norank;p__Actinobacteria;c__Actinobacteria;o__Frankiales;f__Sporichthyaceae;g__hgI_clade</i>                                | 0  | 0  | 0  | 0 | 0 | 0 | 0 | 0 | 0 | 0 | 0  | 0 | 0  | 10 | 0  | 0 | 0 | 0  |
| <i>d__Bacteria;k__norank;p__Actinobacteria;c__Actinobacteria;o__Gaiellales;f__Gaiellaceae;g__Gaiella</i>                                      | 2  | 7  | 8  | 0 | 0 | 1 | 1 | 1 | 0 | 2 | 13 | 0 | 4  | 6  | 3  | 1 | 0 | 0  |
| <i>d__Bacteria;k__norank;p__Actinobacteria;c__Actinobacteria;o__Gaiellales;f__norank_o__Gaiellales;g__norank_o__Gaiellales</i>                | 7  | 4  | 0  | 1 | 0 | 0 | 0 | 0 | 0 | 0 | 0  | 0 | 5  | 1  | 0  | 0 | 0 | 0  |
| <i>d__Bacteria;k__norank;p__Actinobacteria;c__Actinobacteria;o__Micrococcales;f__Brevibacteriaceae;g__Brevibacterium</i>                      | 0  | 0  | 0  | 0 | 0 | 0 | 0 | 0 | 0 | 1 | 0  | 0 | 0  | 0  | 0  | 0 | 0 | 19 |
| <i>d__Bacteria;k__norank;p__Actinobacteria;c__Actinobacteria;o__Micrococcales;f__Dermabacteraceae;g__Brachybacterium</i>                      | 8  | 1  | 0  | 0 | 0 | 0 | 2 | 0 | 1 | 0 | 0  | 6 | 3  | 5  | 0  | 0 | 0 | 0  |
| <i>d__Bacteria;k__norank;p__Actinobacteria;c__Actinobacteria;o__Micrococcales;f__Intrasporangiaceae;g__unclassified_f__Intrasporangiaceae</i> | 0  | 0  | 3  | 1 | 0 | 0 | 1 | 2 | 0 | 0 | 0  | 0 | 0  | 0  | 5  | 0 | 1 | 0  |
| <i>d__Bacteria;k__norank;p__Actinobacteria;c__Actinobacteria;o__Micrococcales;f__Microbacteriaceae;g__Microbacterium</i>                      | 4  | 2  | 2  | 3 | 4 | 1 | 2 | 3 | 1 | 1 | 0  | 1 | 8  | 0  | 1  | 3 | 2 | 6  |
| <i>d__Bacteria;k__norank;p__Actinobacteria;c__Actinobacteria;o__Micrococcales;f__Microbacteriaceae;g__Pseudoclavibacter</i>                   | 5  | 7  | 0  | 0 | 0 | 0 | 0 | 1 | 0 | 0 | 0  | 0 | 4  | 0  | 0  | 1 | 0 | 0  |
| <i>d__Bacteria;k__norank;p__Actinobacteria;c__Actinobacteria;o__Micrococcales;f__Microbacteriaceae;g__unclassified_f__Microbacteriaceae</i>   | 0  | 2  | 0  | 0 | 0 | 0 | 0 | 0 | 0 | 0 | 0  | 0 | 0  | 0  | 0  | 0 | 0 | 0  |
| <i>d__Bacteria;k__norank;p__Actinobacteria;c__Actinobacteria;o__Micrococcales;f__Micrococcaeae;g__Kocuria</i>                                 | 3  | 5  | 0  | 0 | 0 | 1 | 3 | 5 | 3 | 8 | 4  | 3 | 16 | 5  | 9  | 4 | 2 | 2  |
| <i>d__Bacteria;k__norank;p__Actinobacteria;c__Actinobacteria;o__Micrococcales;f__Micrococcaeae;g__Micrococcus</i>                             | 0  | 1  | 5  | 0 | 0 | 0 | 0 | 0 | 0 | 5 | 0  | 8 | 1  | 3  | 8  | 0 | 1 | 5  |







|                                                                                                                                   |    |    |    |   |   |    |    |    |   |   |    |   |   |    |    |   |   |    |
|-----------------------------------------------------------------------------------------------------------------------------------|----|----|----|---|---|----|----|----|---|---|----|---|---|----|----|---|---|----|
| <i>d__Bacteria;k__norank;p__Bacteroidetes;c__Bacteroidia;o__Bacteroidales;f__Porphyromonadaeae;g__Porphyromonas</i>               | 4  | 2  | 2  | 7 | 1 | 1  | 0  | 0  | 5 | 0 | 22 | 1 | 2 | 1  | 1  | 3 | 2 | 0  |
| <i>d__Bacteria;k__norank;p__Bacteroidetes;c__Bacteroidia;o__Bacteroidales;f__Prevotellaceae;g__Alloprevotella</i>                 | 12 | 32 | 17 | 3 | 3 | 7  | 7  | 5  | 1 | 0 | 2  | 0 | 0 | 0  | 9  | 0 | 1 | 0  |
| <i>d__Bacteria;k__norank;p__Bacteroidetes;c__Bacteroidia;o__Bacteroidales;f__Prevotellaceae;g__Prevotella</i>                     | 0  | 0  | 0  | 0 | 1 | 0  | 0  | 0  | 0 | 2 | 0  | 4 | 0 | 0  | 1  | 3 | 5 | 4  |
| <i>d__Bacteria;k__norank;p__Bacteroidetes;c__Bacteroidia;o__Bacteroidales;f__Prevotellaceae;g__Prevotella_1</i>                   | 12 | 22 | 9  | 4 | 1 | 5  | 5  | 0  | 4 | 0 | 0  | 0 | 0 | 0  | 2  | 0 | 4 | 0  |
| <i>d__Bacteria;k__norank;p__Bacteroidetes;c__Bacteroidia;o__Bacteroidales;f__Prevotellaceae;g__Prevotella_7</i>                   | 0  | 18 | 13 | 1 | 3 | 12 | 1  | 1  | 2 | 2 | 13 | 1 | 5 | 0  | 12 | 0 | 1 | 20 |
| <i>d__Bacteria;k__norank;p__Bacteroidetes;c__Bacteroidia;o__Bacteroidales;f__Prevotellaceae;g__Prevotella_9</i>                   | 9  | 29 | 21 | 8 | 6 | 6  | 10 | 7  | 4 | 0 | 0  | 4 | 0 | 2  | 6  | 0 | 0 | 0  |
| <i>d__Bacteria;k__norank;p__Bacteroidetes;c__Bacteroidia;o__Bacteroidales;f__Prevotellaceae;g__Prevotellaceae_NK3B31_group</i>    | 32 | 86 | 20 | 9 | 6 | 19 | 8  | 11 | 5 | 0 | 0  | 0 | 0 | 0  | 21 | 0 | 0 | 0  |
| <i>d__Bacteria;k__norank;p__Bacteroidetes;c__Bacteroidia;o__Bacteroidales;f__Prevotellaceae;g__Prevotellaceae_UCG-001</i>         | 17 | 58 | 2  | 3 | 2 | 4  | 6  | 1  | 2 | 2 | 2  | 6 | 2 | 0  | 15 | 0 | 0 | 0  |
| <i>d__Bacteria;k__norank;p__Bacteroidetes;c__Bacteroidia;o__Bacteroidales;f__Prevotellaceae;g__Prevotellaceae_UCG-003</i>         | 2  | 5  | 11 | 0 | 0 | 2  | 0  | 1  | 0 | 0 | 0  | 0 | 0 | 0  | 0  | 0 | 0 | 0  |
| <i>d__Bacteria;k__norank;p__Bacteroidetes;c__Bacteroidia;o__Bacteroidales;f__Prevotellaceae;g__unclassified_f__Prevotellaceae</i> | 19 | 11 | 0  | 3 | 1 | 1  | 2  | 0  | 0 | 0 | 0  | 0 | 0 | 0  | 0  | 0 | 0 | 0  |
| <i>d__Bacteria;k__norank;p__Bacteroidetes;c__Bacteroidia;o__Bacteroidales;f__Rikenellaceae;g__Alistipes</i>                       | 7  | 37 | 6  | 2 | 2 | 2  | 2  | 4  | 0 | 2 | 0  | 0 | 0 | 0  | 4  | 3 | 0 | 1  |
| <i>d__Bacteria;k__norank;p__Bacteroidetes;c__Bacteroidia;o__Bacteroidales;f__Rikenellaceae;g__Rikenellaceae_RC9_gut_group</i>     | 7  | 34 | 18 | 2 | 4 | 7  | 4  | 2  | 0 | 0 | 0  | 1 | 0 | 14 | 3  | 2 | 0 | 2  |



|                                                                                                                                                                |       |       |       |      |      |      |      |      |      |       |      |      |       |      |      |      |       |      |
|----------------------------------------------------------------------------------------------------------------------------------------------------------------|-------|-------|-------|------|------|------|------|------|------|-------|------|------|-------|------|------|------|-------|------|
| <i>d__Bacteria;k__norank;p__Bacteroidetes;c__Sp<br/>hingobacteriia;o__Sphingobacteriales;f__Sphing<br/>obacteriaceae;g__Sphingobacterium</i>                   | 0     | 0     | 0     | 0    | 0    | 0    | 0    | 0    | 0    | 0     | 0    | 0    | 0     | 0    | 0    | 0    | 0     | 17   |
| <i>d__Bacteria;k__norank;p__Chlamydiae;c__Chl<br/>amydiae;o__Chlamydiales;f__Simkaniaceae;g__<br/>norank_f__Simkaniaceae</i>                                   | 0     | 1     | 0     | 0    | 0    | 0    | 0    | 0    | 0    | 0     | 1    | 0    | 0     | 0    | 0    | 0    | 1     | 0    |
| <i>d__Bacteria;k__norank;p__Chlamydiae;c__Chl<br/>amydiae;o__Chlamydiales;f__unclassified_o__C<br/>hlamydiales;g__unclassified_o__Chlamydiales</i>             | 7     | 0     | 0     | 0    | 0    | 0    | 0    | 0    | 0    | 0     | 0    | 0    | 0     | 0    | 0    | 0    | 0     | 0    |
| <i>d__Bacteria;k__norank;p__Chlorobi;c__Chloro<br/>bia;o__Chlorobiales;f__OPB56;g__norank_f__<br/>OPB56</i>                                                    | 0     | 0     | 0     | 0    | 0    | 0    | 0    | 0    | 0    | 0     | 0    | 0    | 0     | 10   | 0    | 0    | 0     | 0    |
| <i>d__Bacteria;k__norank;p__Chloroflexi;c__Anae<br/>rolinae;o__Anaerolineales;f__Anaerolineaceae<br/>;g__norank_f__Anaerolineaceae</i>                         | 10    | 0     | 0     | 0    | 1    | 0    | 0    | 0    | 0    | 0     | 0    | 0    | 1     | 0    | 0    | 0    | 10    | 18   |
| <i>d__Bacteria;k__norank;p__Chloroflexi;c__Cald<br/>ilineae;o__Caldilineales;f__Caldilineaceae;g__n<br/>orank_f__Caldilineaceae</i>                            | 0     | 0     | 0     | 0    | 0    | 0    | 0    | 1    | 0    | 0     | 0    | 0    | 55    | 17   | 0    | 0    | 0     | 0    |
| <i>d__Bacteria;k__norank;p__Chloroflexi;c__SJA-<br/>15;o__norank_c__SJA-15;f__norank_c__SJA-<br/>15;g__norank_c__SJA-15</i>                                    | 0     | 0     | 2     | 0    | 0    | 0    | 0    | 0    | 0    | 0     | 0    | 0    | 0     | 0    | 0    | 0    | 7     | 0    |
| <i>d__Bacteria;k__norank;p__Chloroflexi;c__Ther<br/>momicrobia;o__AKYG1722;f__norank_o__AKY<br/>G1722;g__norank_o__AKYG1722</i>                                | 6     | 0     | 0     | 0    | 0    | 0    | 0    | 0    | 0    | 0     | 0    | 0    | 0     | 0    | 0    | 0    | 0     | 0    |
| <i>d__Bacteria;k__norank;p__Chloroflexi;c__Ther<br/>momicrobia;o__JG30-KF-<br/>CM45;f__norank_o__JG30-KF-<br/>CM45;g__norank_o__JG30-KF-CM45</i>               | 0     | 0     | 0     | 0    | 0    | 0    | 0    | 9    | 0    | 0     | 0    | 0    | 0     | 0    | 0    | 0    | 2     | 0    |
| <i>d__Bacteria;k__norank;p__Chloroflexi;c__Ther<br/>momicrobia;o__Sphaerobacterales;f__Sphaerob<br/>acteraceae;g__Nitrolancea</i>                              | 0     | 5     | 0     | 0    | 0    | 1    | 0    | 0    | 0    | 0     | 0    | 1    | 0     | 0    | 0    | 0    | 0     | 0    |
| <i>d__Bacteria;k__norank;p__Cyanobacteria;c__C<br/>yanobacteria;o__norank_c__Cyanobacteria;f__<br/>norank_c__Cyanobacteria;g__norank_c__Cyan<br/>obacteria</i> | 21767 | 14128 | 11493 | 1603 | 2452 | 5492 | 4499 | 7888 | 5930 | 11656 | 6592 | 9486 | 13706 | 8951 | #### | 8536 | 13806 | 7780 |

|                                                                                                                                                         |      |     |     |    |    |    |    |    |    |     |     |     |     |     |     |    |    |    |
|---------------------------------------------------------------------------------------------------------------------------------------------------------|------|-----|-----|----|----|----|----|----|----|-----|-----|-----|-----|-----|-----|----|----|----|
| <i>d__Bacteria;k__norank;p__Cyanobacteria;c__Cyanobacteria;o__Obscuribacterales;f__norank_o__Obscuribacterales;g__norank_o__Obscuribacterales</i>       | 15   | 0   | 4   | 0  | 1  | 0  | 1  | 0  | 0  | 0   | 0   | 2   | 0   | 0   | 0   | 2  | 0  | 1  |
| <i>d__Bacteria;k__norank;p__Cyanobacteria;c__Cyanobacteria;o__SubsectionI;f__FamilyI_o__SubsectionI;g__norank_f__FamilyI</i>                            | 0    | 0   | 0   | 0  | 0  | 0  | 0  | 1  | 0  | 0   | 4   | 0   | 9   | 0   | 0   | 0  | 0  | 0  |
| <i>d__Bacteria;k__norank;p__Cyanobacteria;c__Cyanobacteria;o__SubsectionI;f__FamilyI_o__SubsectionI;g__Synechococcus</i>                                | 0    | 4   | 0   | 0  | 0  | 0  | 0  | 5  | 0  | 0   | 0   | 0   | 8   | 141 | 0   | 0  | 0  | 0  |
| <i>d__Bacteria;k__norank;p__Cyanobacteria;c__Cyanobacteria;o__SubsectionI;f__FamilyI_o__SubsectionI;g__unclassified_f__FamilyI_o__SubsectionI</i>       | 0    | 0   | 0   | 0  | 0  | 0  | 0  | 0  | 0  | 0   | 0   | 0   | 14  | 373 | 0   | 0  | 0  | 0  |
| <i>d__Bacteria;k__norank;p__Cyanobacteria;c__Cyanobacteria;o__SubsectionII;f__FamilyII_o__SubsectionII;g__Chroococciopsis</i>                           | 0    | 0   | 9   | 0  | 0  | 0  | 0  | 0  | 0  | 0   | 0   | 4   | 0   | 0   | 0   | 0  | 0  | 0  |
| <i>d__Bacteria;k__norank;p__Cyanobacteria;c__Cyanobacteria;o__SubsectionIII;f__FamilyI_o__SubsectionIII;g__unclassified_f__FamilyI_o__SubsectionIII</i> | 0    | 0   | 0   | 0  | 0  | 0  | 0  | 0  | 0  | 0   | 0   | 5   | 2   | 20  | 0   | 0  | 0  | 0  |
| <i>d__Bacteria;k__norank;p__Deinococcus-Thermus;c__Deinococci;o__Deinococcales;f__Deinococcaceae;g__Deinococcus</i>                                     | 0    | 4   | 0   | 1  | 0  | 0  | 0  | 0  | 0  | 0   | 0   | 3   | 2   | 8   | 7   | 8  | 0  | 0  |
| <i>d__Bacteria;k__norank;p__Deinococcus-Thermus;c__Deinococci;o__Deinococcales;f__Truoperaceae;g__Truopera</i>                                          | 0    | 0   | 0   | 0  | 0  | 1  | 0  | 13 | 0  | 0   | 0   | 0   | 0   | 0   | 0   | 0  | 0  | 0  |
| <i>d__Bacteria;k__norank;p__Deinococcus-Thermus;c__Deinococci;o__Thermales;f__Thermaceae;g__Thermus</i>                                                 | 0    | 0   | 0   | 0  | 0  | 0  | 1  | 0  | 0  | 0   | 0   | 0   | 0   | 11  | 0   | 0  | 0  | 0  |
| <i>d__Bacteria;k__norank;p__Firmicutes;c__Bacilli;o__Bacillales;f__Bacillaceae;g__Bacillus</i>                                                          | 1380 | 301 | 398 | 44 | 32 | 47 | 63 | 51 | 52 | 165 | 193 | 184 | 120 | 151 | 269 | 93 | 55 | 72 |
| <i>d__Bacteria;k__norank;p__Firmicutes;c__Bacilli;o__Bacillales;f__Bacillaceae;g__Geobacillus</i>                                                       | 0    | 0   | 0   | 0  | 1  | 0  | 1  | 0  | 1  | 3   | 6   | 2   | 2   | 1   | 0   | 0  | 2  | 0  |

|                                                                                                                    |     |     |     |    |    |    |    |    |    |     |     |     |    |     |     |    |    |    |
|--------------------------------------------------------------------------------------------------------------------|-----|-----|-----|----|----|----|----|----|----|-----|-----|-----|----|-----|-----|----|----|----|
| <i>d__Bacteria;k__norank;p__Firmicutes;c__Bacilli;o__Bacillales;f__Bacillaceae;g__Oceanobacillus</i>               | 37  | 22  | 27  | 5  | 0  | 9  | 6  | 8  | 8  | 5   | 20  | 15  | 5  | 2   | 0   | 7  | 1  | 4  |
| <i>d__Bacteria;k__norank;p__Firmicutes;c__Bacilli;o__Bacillales;f__Bacillaceae;g__Thalassobacillus</i>             | 1   | 0   | 9   | 0  | 0  | 0  | 0  | 0  | 0  | 0   | 0   | 0   | 0  | 0   | 0   | 0  | 0  | 0  |
| <i>d__Bacteria;k__norank;p__Firmicutes;c__Bacilli;o__Bacillales;f__Bacillaceae;g__unclassified_f__Bacillaceae</i>  | 0   | 0   | 0   | 0  | 0  | 0  | 0  | 0  | 1  | 0   | 0   | 0   | 5  | 0   | 0   | 0  | 0  | 0  |
| <i>d__Bacteria;k__norank;p__Firmicutes;c__Bacilli;o__Bacillales;f__Bacillaceae;g__Virgibacillus</i>                | 0   | 5   | 0   | 0  | 3  | 0  | 2  | 0  | 5  | 0   | 3   | 7   | 3  | 0   | 0   | 5  | 0  | 10 |
| <i>d__Bacteria;k__norank;p__Firmicutes;c__Bacilli;o__Bacillales;f__Family_XI_o__Bacillales;g__Gemella</i>          | 1   | 4   | 0   | 0  | 0  | 0  | 1  | 0  | 0  | 0   | 9   | 2   | 1  | 1   | 1   | 3  | 0  | 0  |
| <i>d__Bacteria;k__norank;p__Firmicutes;c__Bacilli;o__Bacillales;f__Paenibacillaceae;g__Paenibacillus</i>           | 20  | 69  | 27  | 7  | 6  | 12 | 12 | 4  | 1  | 12  | 49  | 11  | 7  | 9   | 9   | 5  | 5  | 1  |
| <i>d__Bacteria;k__norank;p__Firmicutes;c__Bacilli;o__Bacillales;f__Planococcaceae;g__Lysinibacillus</i>            | 0   | 1   | 7   | 0  | 0  | 0  | 0  | 0  | 0  | 0   | 0   | 0   | 2  | 4   | 0   | 0  | 0  | 4  |
| <i>d__Bacteria;k__norank;p__Firmicutes;c__Bacilli;o__Bacillales;f__Planococcaceae;g__Solibacillus</i>              | 11  | 9   | 10  | 2  | 2  | 2  | 2  | 2  | 0  | 9   | 8   | 6   | 0  | 7   | 1   | 7  | 6  | 0  |
| <i>d__Bacteria;k__norank;p__Firmicutes;c__Bacilli;o__Bacillales;f__Staphylococcaceae;g__Staphylococcus</i>         | 6   | 23  | 25  | 5  | 8  | 3  | 4  | 5  | 0  | 4   | 12  | 11  | 4  | 13  | 7   | 5  | 10 | 44 |
| <i>d__Bacteria;k__norank;p__Firmicutes;c__Bacilli;o__Bacillales;f__Thermoactinomycetaceae;g__Kroppenstedtia</i>    | 383 | 631 | 432 | 79 | 30 | 39 | 81 | 70 | 84 | 118 | 286 | 175 | 91 | 218 | 172 | 89 | 82 | 51 |
| <i>d__Bacteria;k__norank;p__Firmicutes;c__Bacilli;o__Bacillales;f__Thermoactinomycetaceae;g__Thermoactinomyces</i> | 0   | 0   | 9   | 0  | 0  | 0  | 0  | 2  | 2  | 1   | 1   | 1   | 0  | 6   | 1   | 0  | 1  | 0  |
| <i>d__Bacteria;k__norank;p__Firmicutes;c__Bacilli;o__Lactobacillales;f__Aerococcaceae;g__Abiotrophia</i>           | 0   | 0   | 0   | 0  | 0  | 0  | 0  | 0  | 0  | 0   | 11  | 0   | 3  | 0   | 0   | 2  | 0  | 0  |



|                                                                                                                                                       |   |    |   |   |   |   |   |   |   |   |   |   |    |   |   |   |   |    |
|-------------------------------------------------------------------------------------------------------------------------------------------------------|---|----|---|---|---|---|---|---|---|---|---|---|----|---|---|---|---|----|
| <i>d__Bacteria;k__norank;p__Firmicutes;c__Clostridia;o__Clostridiales;f__Clostridiales_vadinBB60_group;g__norank_f__Clostridiales_vadinBB60_group</i> | 0 | 10 | 0 | 0 | 0 | 0 | 0 | 0 | 0 | 0 | 0 | 0 | 0  | 0 | 0 | 0 | 0 | 0  |
| <i>d__Bacteria;k__norank;p__Firmicutes;c__Clostridia;o__Clostridiales;f__Family_XI_o__Clostridiales;g__Anaerococcus</i>                               | 0 | 0  | 0 | 0 | 2 | 0 | 0 | 0 | 0 | 2 | 0 | 0 | 0  | 0 | 3 | 1 | 1 | 14 |
| <i>d__Bacteria;k__norank;p__Firmicutes;c__Clostridia;o__Clostridiales;f__Family_XI_o__Clostridiales;g__Ezakiella</i>                                  | 0 | 0  | 0 | 0 | 0 | 0 | 0 | 0 | 0 | 0 | 0 | 0 | 0  | 0 | 8 | 0 | 0 | 0  |
| <i>d__Bacteria;k__norank;p__Firmicutes;c__Clostridia;o__Clostridiales;f__Family_XI_o__Clostridiales;g__Finegoldia</i>                                 | 0 | 0  | 2 | 0 | 0 | 1 | 0 | 1 | 0 | 0 | 4 | 5 | 5  | 0 | 0 | 5 | 4 | 15 |
| <i>d__Bacteria;k__norank;p__Firmicutes;c__Clostridia;o__Clostridiales;f__Family_XI_o__Clostridiales;g__Gallicola</i>                                  | 0 | 0  | 0 | 0 | 0 | 0 | 0 | 0 | 0 | 0 | 0 | 0 | 29 | 0 | 0 | 0 | 0 | 0  |
| <i>d__Bacteria;k__norank;p__Firmicutes;c__Clostridia;o__Clostridiales;f__Family_XI_o__Clostridiales;g__Peptoniphilus</i>                              | 0 | 4  | 4 | 0 | 0 | 0 | 0 | 0 | 0 | 0 | 7 | 2 | 13 | 0 | 4 | 1 | 2 | 3  |
| <i>d__Bacteria;k__norank;p__Firmicutes;c__Clostridia;o__Clostridiales;f__Family_XI_o__Clostridiales;g__Sedimentibacter</i>                            | 0 | 10 | 0 | 0 | 0 | 0 | 0 | 0 | 0 | 0 | 0 | 0 | 0  | 0 | 0 | 0 | 0 | 0  |
| <i>d__Bacteria;k__norank;p__Firmicutes;c__Clostridia;o__Clostridiales;f__Family_XIII;g__[Eubacterium]_nodatum_group</i>                               | 0 | 0  | 0 | 2 | 0 | 1 | 0 | 1 | 0 | 0 | 0 | 0 | 0  | 0 | 0 | 0 | 0 | 0  |
| <i>d__Bacteria;k__norank;p__Firmicutes;c__Clostridia;o__Clostridiales;f__Family_XIII;g__Family_XIII_AD3011_group</i>                                  | 0 | 8  | 4 | 1 | 3 | 0 | 0 | 0 | 0 | 0 | 2 | 0 | 0  | 0 | 0 | 0 | 0 | 0  |
| <i>d__Bacteria;k__norank;p__Firmicutes;c__Clostridia;o__Clostridiales;f__Family_XIII;g__norank_f__XIII</i>                                            | 0 | 5  | 0 | 0 | 0 | 0 | 0 | 0 | 0 | 0 | 0 | 0 | 0  | 0 | 0 | 0 | 0 | 0  |
| <i>d__Bacteria;k__norank;p__Firmicutes;c__Clostridia;o__Clostridiales;f__Lachnospiraceae;g__[Eubacterium]_eligens_group</i>                           | 1 | 1  | 3 | 0 | 0 | 4 | 1 | 1 | 0 | 0 | 0 | 0 | 0  | 0 | 0 | 0 | 0 | 0  |
| <i>d__Bacteria;k__norank;p__Firmicutes;c__Clostridia;o__Clostridiales;f__Lachnospiraceae;g__[Eubacterium]_fissicatena_group</i>                       | 1 | 5  | 0 | 0 | 1 | 2 | 1 | 4 | 1 | 3 | 3 | 1 | 0  | 0 | 0 | 1 | 0 | 0  |



|                                                                                                                                |    |   |    |   |    |    |   |   |   |   |   |   |    |   |    |   |   |    |
|--------------------------------------------------------------------------------------------------------------------------------|----|---|----|---|----|----|---|---|---|---|---|---|----|---|----|---|---|----|
| <i>d__Bacteria;k__norank;p__Firmicutes;c__Clostridia;o__Clostridiales;f__Lachnospiraceae;g__[Eubacterium]_hallii_group</i>     | 0  | 0 | 0  | 0 | 0  | 0  | 0 | 0 | 0 | 0 | 0 | 3 | 0  | 0 | 0  | 0 | 0 | 0  |
| <i>d__Bacteria;k__norank;p__Firmicutes;c__Clostridia;o__Clostridiales;f__Lachnospiraceae;g__[Ruminococcus]_gnavus_group</i>    | 0  | 2 | 6  | 1 | 0  | 2  | 1 | 0 | 1 | 0 | 0 | 0 | 12 | 0 | 1  | 3 | 0 | 0  |
| <i>d__Bacteria;k__norank;p__Firmicutes;c__Clostridia;o__Clostridiales;f__Lachnospiraceae;g__[Ruminococcus]_torques_group</i>   | 7  | 1 | 2  | 0 | 0  | 13 | 2 | 0 | 0 | 0 | 3 | 2 | 0  | 0 | 0  | 0 | 0 | 0  |
| <i>d__Bacteria;k__norank;p__Firmicutes;c__Clostridia;o__Clostridiales;f__Lachnospiraceae;g__A_nerostipes</i>                   | 2  | 6 | 4  | 0 | 1  | 2  | 0 | 5 | 0 | 0 | 0 | 0 | 0  | 0 | 2  | 0 | 0 | 0  |
| <i>d__Bacteria;k__norank;p__Firmicutes;c__Clostridia;o__Clostridiales;f__Lachnospiraceae;g__B_lautia</i>                       | 9  | 0 | 3  | 0 | 0  | 0  | 0 | 0 | 1 | 0 | 0 | 1 | 0  | 0 | 5  | 0 | 0 | 1  |
| <i>d__Bacteria;k__norank;p__Firmicutes;c__Clostridia;o__Clostridiales;f__Lachnospiraceae;g__Coproccoccus_1</i>                 | 0  | 0 | 5  | 0 | 0  | 0  | 1 | 1 | 0 | 0 | 4 | 0 | 0  | 0 | 0  | 0 | 0 | 0  |
| <i>d__Bacteria;k__norank;p__Firmicutes;c__Clostridia;o__Clostridiales;f__Lachnospiraceae;g__Coproccoccus_3</i>                 | 0  | 0 | 7  | 1 | 0  | 1  | 2 | 0 | 0 | 0 | 0 | 1 | 0  | 0 | 0  | 0 | 0 | 0  |
| <i>d__Bacteria;k__norank;p__Firmicutes;c__Clostridia;o__Clostridiales;f__Lachnospiraceae;g__L_achnoanaerobaculum</i>           | 0  | 0 | 0  | 0 | 0  | 0  | 2 | 0 | 0 | 0 | 3 | 1 | 0  | 0 | 0  | 0 | 1 | 15 |
| <i>d__Bacteria;k__norank;p__Firmicutes;c__Clostridia;o__Clostridiales;f__Lachnospiraceae;g__L_achnoclostridium</i>             | 0  | 0 | 0  | 0 | 0  | 2  | 0 | 0 | 0 | 2 | 0 | 0 | 7  | 0 | 0  | 0 | 0 | 0  |
| <i>d__Bacteria;k__norank;p__Firmicutes;c__Clostridia;o__Clostridiales;f__Lachnospiraceae;g__L_achnospira</i>                   | 6  | 0 | 2  | 0 | 0  | 0  | 0 | 1 | 0 | 0 | 7 | 0 | 0  | 0 | 0  | 0 | 0 | 0  |
| <i>d__Bacteria;k__norank;p__Firmicutes;c__Clostridia;o__Clostridiales;f__Lachnospiraceae;g__L_achnospiraceae_NK4A136_group</i> | 14 | 8 | 17 | 6 | 12 | 8  | 8 | 8 | 6 | 0 | 0 | 0 | 0  | 1 | 11 | 0 | 2 | 0  |
| <i>d__Bacteria;k__norank;p__Firmicutes;c__Clostridia;o__Clostridiales;f__Lachnospiraceae;g__L_achnospiraceae_UCG-001</i>       | 1  | 0 | 0  | 0 | 0  | 1  | 1 | 0 | 2 | 0 | 0 | 0 | 0  | 0 | 5  | 0 | 0 | 0  |





|                                                                                                                                              |    |    |    |   |   |   |   |    |   |   |   |   |   |   |   |   |   |   |
|----------------------------------------------------------------------------------------------------------------------------------------------|----|----|----|---|---|---|---|----|---|---|---|---|---|---|---|---|---|---|
| <i>d__Bacteria;k__norank;p__Firmicutes;c__Clostridia;o__Clostridiales;f__Ruminococcaceae;g__Ruminococcaceae_UCG-010</i>                      | 5  | 0  | 0  | 0 | 0 | 0 | 0 | 0  | 0 | 0 | 0 | 0 | 0 | 0 | 0 | 0 | 0 | 0 |
| <i>d__Bacteria;k__norank;p__Firmicutes;c__Clostridia;o__Clostridiales;f__Ruminococcaceae;g__Ruminococcaceae_UCG-011</i>                      | 1  | 3  | 12 | 0 | 1 | 0 | 0 | 1  | 0 | 2 | 4 | 0 | 0 | 0 | 3 | 0 | 0 | 0 |
| <i>d__Bacteria;k__norank;p__Firmicutes;c__Clostridia;o__Clostridiales;f__Ruminococcaceae;g__Ruminococcaceae_UCG-014</i>                      | 1  | 11 | 0  | 1 | 6 | 4 | 5 | 1  | 2 | 0 | 1 | 0 | 0 | 0 | 9 | 0 | 0 | 0 |
| <i>d__Bacteria;k__norank;p__Firmicutes;c__Clostridia;o__Clostridiales;f__Ruminococcaceae;g__Ruminococcus_1</i>                               | 0  | 25 | 4  | 0 | 0 | 1 | 1 | 0  | 0 | 2 | 0 | 0 | 0 | 0 | 1 | 0 | 0 | 0 |
| <i>d__Bacteria;k__norank;p__Firmicutes;c__Clostridia;o__Clostridiales;f__Ruminococcaceae;g__Ruminococcus_2</i>                               | 0  | 17 | 11 | 2 | 0 | 2 | 4 | 1  | 0 | 9 | 0 | 0 | 2 | 0 | 0 | 1 | 0 | 0 |
| <i>d__Bacteria;k__norank;p__Firmicutes;c__Clostridia;o__Clostridiales;f__Ruminococcaceae;g__Subdoligranulum</i>                              | 6  | 16 | 11 | 1 | 0 | 6 | 2 | 3  | 0 | 1 | 0 | 0 | 0 | 0 | 3 | 0 | 0 | 0 |
| <i>d__Bacteria;k__norank;p__Firmicutes;c__Erysipelotrichia;o__Erysipelotrichales;f__Erysipelotrichaceae;g__Catenibacterium</i>               | 0  | 0  | 6  | 0 | 0 | 1 | 1 | 0  | 0 | 0 | 0 | 0 | 0 | 0 | 0 | 0 | 0 | 0 |
| <i>d__Bacteria;k__norank;p__Firmicutes;c__Erysipelotrichia;o__Erysipelotrichales;f__Erysipelotrichaceae;g__Erysipelatoclostridium</i>        | 0  | 0  | 4  | 2 | 1 | 3 | 0 | 3  | 0 | 0 | 3 | 0 | 0 | 0 | 0 | 4 | 3 | 0 |
| <i>d__Bacteria;k__norank;p__Firmicutes;c__Erysipelotrichia;o__Erysipelotrichales;f__Erysipelotrichaceae;g__Erysipelotrichaceae_UCG-002</i>   | 6  | 0  | 0  | 1 | 0 | 1 | 0 | 1  | 0 | 0 | 0 | 0 | 0 | 0 | 0 | 0 | 0 | 3 |
| <i>d__Bacteria;k__norank;p__Firmicutes;c__Erysipelotrichia;o__Erysipelotrichales;f__Erysipelotrichaceae;g__Faecalibaculum</i>                | 2  | 12 | 11 | 0 | 0 | 0 | 1 | 6  | 2 | 2 | 6 | 4 | 5 | 1 | 1 | 1 | 0 | 0 |
| <i>d__Bacteria;k__norank;p__Firmicutes;c__Erysipelotrichia;o__Erysipelotrichales;f__Erysipelotrichaceae;g__Holdemanella</i>                  | 11 | 0  | 0  | 1 | 0 | 0 | 2 | 1  | 0 | 0 | 0 | 0 | 0 | 0 | 0 | 0 | 0 | 0 |
| <i>d__Bacteria;k__norank;p__Firmicutes;c__Erysipelotrichia;o__Erysipelotrichales;f__Erysipelotrichaceae;g__norank_f__Erysipelotrichaceae</i> | 1  | 9  | 8  | 0 | 4 | 7 | 4 | 14 | 0 | 0 | 0 | 0 | 4 | 1 | 0 | 0 | 6 | 0 |

|                                                                                                                                                |    |    |    |   |   |   |   |   |   |    |    |   |    |    |    |   |   |    |
|------------------------------------------------------------------------------------------------------------------------------------------------|----|----|----|---|---|---|---|---|---|----|----|---|----|----|----|---|---|----|
| <i>d__Bacteria;k__norank;p__Firmicutes;c__Limn<br/>ochordia;o__Limnochordales;f__norank_o__Li<br/>mnochordales;g__norank_o__Limnochordales</i> | 17 | 0  | 0  | 0 | 0 | 0 | 0 | 0 | 0 | 0  | 0  | 0 | 0  | 0  | 0  | 0 | 0 | 0  |
| <i>d__Bacteria;k__norank;p__Firmicutes;c__Negat<br/>ivicutes;o__Selenomonadales;f__Acidaminococc<br/>aceae;g__Phascolarctobacterium</i>        | 8  | 8  | 6  | 2 | 1 | 1 | 0 | 3 | 1 | 0  | 0  | 0 | 1  | 0  | 10 | 0 | 0 | 0  |
| <i>d__Bacteria;k__norank;p__Firmicutes;c__Negat<br/>ivicutes;o__Selenomonadales;f__Veillonellaceae<br/>;g__Dialister</i>                       | 4  | 12 | 0  | 0 | 0 | 0 | 1 | 2 | 1 | 0  | 0  | 0 | 0  | 0  | 0  | 0 | 2 | 0  |
| <i>d__Bacteria;k__norank;p__Firmicutes;c__Negat<br/>ivicutes;o__Selenomonadales;f__Veillonellaceae<br/>;g__Megasphaera</i>                     | 13 | 16 | 17 | 0 | 0 | 2 | 1 | 7 | 0 | 0  | 0  | 2 | 2  | 0  | 19 | 0 | 0 | 0  |
| <i>d__Bacteria;k__norank;p__Firmicutes;c__Negat<br/>ivicutes;o__Selenomonadales;f__Veillonellaceae<br/>;g__Schwartzia</i>                      | 0  | 0  | 0  | 0 | 0 | 0 | 0 | 0 | 0 | 0  | 0  | 0 | 0  | 0  | 0  | 0 | 0 | 29 |
| <i>d__Bacteria;k__norank;p__Firmicutes;c__Negat<br/>ivicutes;o__Selenomonadales;f__Veillonellaceae<br/>;g__Selenomonas</i>                     | 3  | 12 | 6  | 0 | 0 | 3 | 0 | 1 | 0 | 0  | 0  | 1 | 0  | 1  | 1  | 0 | 0 | 0  |
| <i>d__Bacteria;k__norank;p__Firmicutes;c__Negat<br/>ivicutes;o__Selenomonadales;f__Veillonellaceae<br/>;g__Veillonella</i>                     | 3  | 0  | 5  | 0 | 1 | 1 | 0 | 0 | 1 | 12 | 14 | 3 | 10 | 1  | 1  | 2 | 3 | 9  |
| <i>d__Bacteria;k__norank;p__Fusobacteria;c__Fu<br/>sobacteriia;o__Fusobacteriales;f__Fusobacteria<br/>ceae;g__Cetobacterium</i>                | 0  | 13 | 0  | 0 | 4 | 2 | 1 | 9 | 1 | 8  | 23 | 0 | 2  | 0  | 7  | 1 | 0 | 0  |
| <i>d__Bacteria;k__norank;p__Fusobacteria;c__Fu<br/>sobacteriia;o__Fusobacteriales;f__Fusobacteria<br/>ceae;g__Fusobacterium</i>                | 2  | 0  | 19 | 0 | 0 | 3 | 1 | 0 | 3 | 0  | 21 | 7 | 7  | 2  | 0  | 1 | 2 | 31 |
| <i>d__Bacteria;k__norank;p__Fusobacteria;c__Fu<br/>sobacteriia;o__Fusobacteriales;f__Fusobacteria<br/>ceae;g__Propionigenium</i>               | 0  | 0  | 0  | 0 | 0 | 0 | 0 | 0 | 0 | 0  | 0  | 0 | 0  | 10 | 0  | 0 | 0 | 0  |
| <i>d__Bacteria;k__norank;p__Fusobacteria;c__Fu<br/>sobacteriia;o__Fusobacteriales;f__Leptotrichiac<br/>eae;g__Leptotrichia</i>                 | 0  | 2  | 33 | 1 | 0 | 5 | 0 | 0 | 2 | 0  | 20 | 6 | 12 | 0  | 2  | 0 | 4 | 5  |
| <i>d__Bacteria;k__norank;p__Fusobacteria;c__Fu<br/>sobacteriia;o__Fusobacteriales;f__Leptotrichiac<br/>eae;g__norank_f__Leptotrichiaceae</i>   | 0  | 0  | 0  | 0 | 0 | 0 | 0 | 0 | 0 | 0  | 0  | 0 | 0  | 80 | 0  | 0 | 0 | 0  |

|                                                                                                                                                                     |    |    |    |   |   |    |   |   |   |    |    |    |   |    |   |    |    |    |
|---------------------------------------------------------------------------------------------------------------------------------------------------------------------|----|----|----|---|---|----|---|---|---|----|----|----|---|----|---|----|----|----|
| <i>d__Bacteria;k__norank;p__Gemmatimonadetes;c__Gemmatimonadetes;o__Gemmatimonadales;f__Gemmatimonadaceae;g__norank_f__Gemmatimonadaceae</i>                        | 0  | 0  | 7  | 0 | 0 | 0  | 0 | 0 | 0 | 0  | 0  | 0  | 0 | 0  | 0 | 0  | 0  | 0  |
| <i>d__Bacteria;k__norank;p__Gemmatimonadetes;c__Gemmatimonadetes;o__Longimicrobiales;f__Longimicrobiaceae;g__norank_f__Longimicrobiaceae</i>                        | 0  | 0  | 0  | 0 | 0 | 0  | 0 | 0 | 0 | 0  | 5  | 0  | 0 | 0  | 0 | 0  | 0  | 7  |
| <i>d__Bacteria;k__norank;p__Latescibacteria;c__norank_p__Latescibacteria;o__norank_p__Latescibacteria;f__norank_p__Latescibacteria;g__norank_p__Latescibacteria</i> | 0  | 0  | 0  | 0 | 0 | 0  | 0 | 0 | 0 | 0  | 0  | 0  | 0 | 0  | 8 | 0  | 0  | 0  |
| <i>d__Bacteria;k__norank;p__Nitrospirae;c__Nitrospira;o__norank_c__Nitrospira;f__norank_c__Nitrospira;g__Nitrospira</i>                                             | 25 | 24 | 34 | 9 | 7 | 10 | 7 | 3 | 6 | 13 | 14 | 17 | 3 | 4  | 8 | 11 | 12 | 8  |
| <i>d__Bacteria;k__norank;p__Omnitrophica;c__norank_p__Omnitrophica;o__norank_p__Omnitrophica;f__norank_p__Omnitrophica;g__norank_p__Omnitrophica</i>                | 0  | 0  | 0  | 0 | 0 | 0  | 0 | 0 | 1 | 2  | 0  | 0  | 1 | 1  | 0 | 0  | 0  | 0  |
| <i>d__Bacteria;k__norank;p__Parcubacteria;c__norank_p__Parcubacteria;o__norank_p__Parcubacteria;f__norank_p__Parcubacteria;g__norank_p__Parcubacteria</i>           | 0  | 8  | 5  | 0 | 0 | 0  | 2 | 2 | 0 | 4  | 0  | 0  | 0 | 0  | 0 | 2  | 0  | 2  |
| <i>d__Bacteria;k__norank;p__Planctomycetes;c__BD7-11;o__norank_c__BD7-11;f__norank_c__BD7-11;g__norank_c__BD7-11</i>                                                | 11 | 3  | 14 | 2 | 2 | 3  | 0 | 2 | 1 | 3  | 2  | 2  | 7 | 0  | 1 | 1  | 3  | 0  |
| <i>d__Bacteria;k__norank;p__Planctomycetes;c__Phycisphaerae;o__Phycisphaerales;f__Phycisphaerae;g__CL500-3</i>                                                      | 0  | 0  | 0  | 0 | 0 | 0  | 0 | 0 | 0 | 0  | 0  | 0  | 0 | 21 | 0 | 0  | 0  | 0  |
| <i>d__Bacteria;k__norank;p__Planctomycetes;c__Planctomycetacia;o__Brocadiales;f__Brocadiales;g__Candidatus_Kuenenia</i>                                             | 2  | 0  | 0  | 0 | 0 | 0  | 0 | 0 | 0 | 0  | 0  | 0  | 0 | 0  | 0 | 0  | 4  | 17 |
| <i>d__Bacteria;k__norank;p__Planctomycetes;c__vadinHA49;o__norank_c__vadinHA49;f__norank_c__vadinHA49;g__norank_c__vadinHA49</i>                                    | 0  | 0  | 0  | 0 | 0 | 0  | 0 | 0 | 0 | 0  | 0  | 0  | 5 | 0  | 0 | 0  | 0  | 0  |

|                                                                                                                                             |    |    |     |    |    |    |    |    |    |    |     |    |    |    |    |    |    |    |
|---------------------------------------------------------------------------------------------------------------------------------------------|----|----|-----|----|----|----|----|----|----|----|-----|----|----|----|----|----|----|----|
| <i>d__Bacteria;k__norank;p__Proteobacteria;c__Alphaproteobacteria;o__Caulobacteriales;f__Caulobacteraceae;g__Brevundimonas</i>              | 89 | 90 | 107 | 19 | 9  | 24 | 47 | 25 | 12 | 51 | 125 | 31 | 42 | 36 | 75 | 35 | 51 | 31 |
| <i>d__Bacteria;k__norank;p__Proteobacteria;c__Alphaproteobacteria;o__Caulobacteriales;f__Caulobacteraceae;g__Caulobacter</i>                | 2  | 1  | 0   | 2  | 0  | 0  | 0  | 0  | 0  | 0  | 9   | 0  | 1  | 2  | 0  | 1  | 0  | 0  |
| <i>d__Bacteria;k__norank;p__Proteobacteria;c__Alphaproteobacteria;o__Caulobacteriales;f__Caulobacteraceae;g__norank_f__Caulobacteraceae</i> | 1  | 1  | 0   | 1  | 2  | 1  | 0  | 1  | 0  | 0  | 0   | 3  | 0  | 0  | 0  | 0  | 1  | 0  |
| <i>d__Bacteria;k__norank;p__Proteobacteria;c__Alphaproteobacteria;o__Caulobacteriales;f__Hymenobacteriales;g__Hirschia</i>                  | 0  | 0  | 0   | 0  | 0  | 0  | 0  | 0  | 0  | 0  | 0   | 0  | 0  | 11 | 0  | 0  | 0  | 0  |
| <i>d__Bacteria;k__norank;p__Proteobacteria;c__Alphaproteobacteria;o__Caulobacteriales;f__Hymenobacteriales;g__Woodsholea</i>                | 0  | 0  | 0   | 0  | 0  | 0  | 0  | 0  | 0  | 0  | 0   | 0  | 0  | 0  | 0  | 0  | 0  | 21 |
| <i>d__Bacteria;k__norank;p__Proteobacteria;c__Alphaproteobacteria;o__Rhizobiales;f__Bradyrhizobiaceae;g__Bosea</i>                          | 1  | 0  | 0   | 1  | 1  | 2  | 4  | 0  | 0  | 5  | 8   | 0  | 3  | 3  | 4  | 2  | 2  | 0  |
| <i>d__Bacteria;k__norank;p__Proteobacteria;c__Alphaproteobacteria;o__Rhizobiales;f__Bradyrhizobiaceae;g__Bradyrhizobium</i>                 | 4  | 14 | 19  | 3  | 6  | 4  | 7  | 2  | 0  | 1  | 17  | 17 | 4  | 40 | 10 | 11 | 9  | 25 |
| <i>d__Bacteria;k__norank;p__Proteobacteria;c__Alphaproteobacteria;o__Rhizobiales;f__Bradyrhizobiaceae;g__Rhodopseudomonas</i>               | 1  | 7  | 1   | 0  | 1  | 1  | 0  | 0  | 0  | 0  | 1   | 3  | 0  | 7  | 0  | 1  | 0  | 0  |
| <i>d__Bacteria;k__norank;p__Proteobacteria;c__Alphaproteobacteria;o__Rhizobiales;f__Brucellaceae;g__Ochrobactrum</i>                        | 74 | 35 | 53  | 12 | 19 | 21 | 23 | 17 | 11 | 21 | 127 | 49 | 14 | 7  | 12 | 21 | 11 | 11 |
| <i>d__Bacteria;k__norank;p__Proteobacteria;c__Alphaproteobacteria;o__Rhizobiales;f__Hyphomicrobiales;g__Devosia</i>                         | 9  | 0  | 9   | 1  | 0  | 0  | 0  | 1  | 0  | 0  | 0   | 1  | 0  | 0  | 0  | 1  | 0  | 0  |
| <i>d__Bacteria;k__norank;p__Proteobacteria;c__Alphaproteobacteria;o__Rhizobiales;f__Hyphomicrobiales;g__Pedomicrobium</i>                   | 1  | 0  | 0   | 0  | 1  | 0  | 1  | 0  | 0  | 1  | 3   | 0  | 0  | 0  | 7  | 0  | 0  | 0  |
| <i>d__Bacteria;k__norank;p__Proteobacteria;c__Alphaproteobacteria;o__Rhizobiales;f__Methylobacteriales;g__Methylobacterium</i>              | 4  | 0  | 5   | 0  | 1  | 0  | 0  | 0  | 2  | 0  | 13  | 9  | 1  | 0  | 1  | 0  | 2  | 15 |

|                                                                                                                                                    |     |     |     |    |    |    |    |    |    |    |     |    |    |    |    |    |    |    |
|----------------------------------------------------------------------------------------------------------------------------------------------------|-----|-----|-----|----|----|----|----|----|----|----|-----|----|----|----|----|----|----|----|
| <i>d__Bacteria;k__norank;p__Proteobacteria;c__Alphaproteobacteria;o__Rhizobiales;f__Methylobacteriaceae;g__Microvirga</i>                          | 0   | 0   | 2   | 0  | 0  | 2  | 0  | 0  | 0  | 0  | 0   | 0  | 1  | 0  | 2  | 0  | 0  | 3  |
| <i>d__Bacteria;k__norank;p__Proteobacteria;c__Alphaproteobacteria;o__Rhizobiales;f__MNG7;g__norank_f__MNG7</i>                                     | 0   | 0   | 7   | 2  | 0  | 1  | 0  | 0  | 0  | 0  | 0   | 0  | 3  | 0  | 0  | 2  | 0  | 0  |
| <i>d__Bacteria;k__norank;p__Proteobacteria;c__Alphaproteobacteria;o__Rhizobiales;f__Phyllobacteriaceae;g__Mesorhizobium</i>                        | 22  | 3   | 12  | 4  | 1  | 7  | 4  | 1  | 0  | 9  | 5   | 3  | 20 | 5  | 2  | 5  | 3  | 13 |
| <i>d__Bacteria;k__norank;p__Proteobacteria;c__Alphaproteobacteria;o__Rhizobiales;f__Rhizobacteriaceae;g__Rhizobium</i>                             | 117 | 143 | 116 | 33 | 24 | 33 | 46 | 48 | 23 | 59 | 197 | 69 | 44 | 50 | 64 | 38 | 57 | 24 |
| <i>d__Bacteria;k__norank;p__Proteobacteria;c__Alphaproteobacteria;o__Rhizobiales;f__Rhizobiales_Incertae_Sedis;g__Rhizomicrobium</i>               | 2   | 8   | 0   | 1  | 0  | 3  | 0  | 0  | 0  | 0  | 0   | 0  | 0  | 0  | 0  | 8  | 0  | 0  |
| <i>d__Bacteria;k__norank;p__Proteobacteria;c__Alphaproteobacteria;o__Rhizobiales;f__unclassified_o__Rhizobiales;g__unclassified_o__Rhizobiales</i> | 0   | 5   | 4   | 3  | 0  | 0  | 0  | 0  | 0  | 0  | 5   | 11 | 0  | 1  | 0  | 0  | 0  | 1  |
| <i>d__Bacteria;k__norank;p__Proteobacteria;c__Alphaproteobacteria;o__Rhizobiales;f__Xanthobacteraceae;g__Pseudolabrys</i>                          | 0   | 0   | 0   | 0  | 4  | 0  | 0  | 0  | 0  | 5  | 11  | 0  | 0  | 0  | 0  | 0  | 0  | 0  |
| <i>d__Bacteria;k__norank;p__Proteobacteria;c__Alphaproteobacteria;o__Rhizobiales;f__Xanthobacteraceae;g__unclassified_f__Xanthobacteraceae</i>     | 10  | 9   | 0   | 3  | 1  | 0  | 4  | 1  | 0  | 1  | 0   | 0  | 4  | 7  | 0  | 0  | 0  | 0  |
| <i>d__Bacteria;k__norank;p__Proteobacteria;c__Alphaproteobacteria;o__Rhodobacterales;f__Rhodobacteraceae;g__Paracoccus</i>                         | 7   | 19  | 10  | 5  | 0  | 0  | 0  | 1  | 1  | 0  | 6   | 14 | 10 | 2  | 9  | 0  | 0  | 16 |
| <i>d__Bacteria;k__norank;p__Proteobacteria;c__Alphaproteobacteria;o__Rhodobacterales;f__Rhodobacteraceae;g__Rhodobacter</i>                        | 0   | 0   | 8   | 0  | 0  | 0  | 0  | 6  | 0  | 0  | 0   | 0  | 4  | 0  | 0  | 0  | 1  | 0  |
| <i>d__Bacteria;k__norank;p__Proteobacteria;c__Alphaproteobacteria;o__Rhodobacterales;f__Rhodobacteraceae;g__Rubellimicrobium</i>                   | 8   | 0   | 2   | 0  | 0  | 0  | 1  | 0  | 2  | 0  | 5   | 0  | 0  | 1  | 0  | 1  | 0  | 0  |
| <i>d__Bacteria;k__norank;p__Proteobacteria;c__Alphaproteobacteria;o__Rhodobacterales;f__Rhodobacteraceae;g__Rubribacterium</i>                     | 0   | 0   | 0   | 0  | 0  | 0  | 0  | 0  | 0  | 0  | 0   | 0  | 9  | 0  | 0  | 0  | 0  | 0  |





|                                                                                                                                                     |      |      |      |      |     |     |      |     |      |      |      |      |      |      |      |      |     |     |
|-----------------------------------------------------------------------------------------------------------------------------------------------------|------|------|------|------|-----|-----|------|-----|------|------|------|------|------|------|------|------|-----|-----|
| <i>d__Bacteria;k__norank;p__Proteobacteria;c__Alphaproteobacteria;o__Rickettsiales;f__Mitochondria;g__norank_f__Mitochondria</i>                    | 2100 | 1572 | 748  | 587  | 530 | 330 | 346  | 859 | 1008 | 1329 | 462  | 1852 | 4046 | 556  | 2757 | 1074 | 808 | 758 |
| <i>d__Bacteria;k__norank;p__Proteobacteria;c__Alphaproteobacteria;o__Rickettsiales;f__TK34;g__norank_f__TK34</i>                                    | 0    | 11   | 4    | 2    | 0   | 1   | 1    | 0   | 1    | 0    | 11   | 0    | 0    | 0    | 0    | 1    | 1   | 0   |
| <i>d__Bacteria;k__norank;p__Proteobacteria;c__Alphaproteobacteria;o__Sphingomonadales;f__Sphingomonadaceae;g__Sandaracinobacter</i>                 | 0    | 0    | 2    | 0    | 0   | 0   | 0    | 0   | 0    | 0    | 0    | 0    | 0    | 0    | 0    | 1    | 0   | 21  |
| <i>d__Bacteria;k__norank;p__Proteobacteria;c__Alphaproteobacteria;o__Sphingomonadales;f__Sphingomonadaceae;g__Sphingobium</i>                       | 184  | 195  | 274  | 53   | 66  | 84  | 63   | 78  | 33   | 150  | 273  | 148  | 56   | 57   | 121  | 112  | 72  | 60  |
| <i>d__Bacteria;k__norank;p__Proteobacteria;c__Alphaproteobacteria;o__Sphingomonadales;f__Sphingomonadaceae;g__Sphingomonas</i>                      | 72   | 54   | 94   | 15   | 19  | 15  | 25   | 25  | 11   | 31   | 95   | 31   | 27   | 37   | 14   | 12   | 23  | 35  |
| <i>d__Bacteria;k__norank;p__Proteobacteria;c__Alphaproteobacteria;o__Sphingomonadales;f__Sphingomonadaceae;g__unclassified_f__Sphingomonadaceae</i> | 2    | 0    | 0    | 0    | 0   | 0   | 0    | 0   | 0    | 0    | 0    | 2    | 2    | 0    | 0    | 0    | 0   | 0   |
| <i>d__Bacteria;k__norank;p__Proteobacteria;c__Betaproteobacteria;o__Burkholderiales;f__Alcaligenaceae;g__Achromobacter</i>                          | 11   | 25   | 32   | 4    | 7   | 4   | 4    | 3   | 7    | 6    | 32   | 34   | 7    | 8    | 16   | 23   | 15  | 14  |
| <i>d__Bacteria;k__norank;p__Proteobacteria;c__Betaproteobacteria;o__Burkholderiales;f__Burkholderiaceae;g__Burkholderia-Paraburkholderia</i>        | 1046 | 1303 | 1680 | 318  | 362 | 398 | 519  | 477 | 182  | 688  | 1406 | 589  | 408  | 478  | 435  | 373  | 432 | 310 |
| <i>d__Bacteria;k__norank;p__Proteobacteria;c__Betaproteobacteria;o__Burkholderiales;f__Burkholderiaceae;g__Ralstonia</i>                            | 3552 | 3833 | 5169 | 1007 | 560 | 820 | 1240 | 977 | 688  | 876  | 1681 | 1950 | 1444 | 2001 | 1752 | 1325 | 803 | 629 |
| <i>d__Bacteria;k__norank;p__Proteobacteria;c__Betaproteobacteria;o__Burkholderiales;f__Comamonadaceae;g__Acidovorax</i>                             | 471  | 600  | 629  | 132  | 138 | 166 | 257  | 243 | 102  | 311  | 738  | 279  | 159  | 138  | 189  | 191  | 160 | 184 |
| <i>d__Bacteria;k__norank;p__Proteobacteria;c__Betaproteobacteria;o__Burkholderiales;f__Comamonadaceae;g__Aquabacterium</i>                          | 9    | 4    | 17   | 1    | 3   | 2   | 1    | 2   | 1    | 1    | 19   | 9    | 2    | 4    | 1    | 13   | 2   | 0   |

|                                                                                                                                                                |      |      |      |     |     |     |      |      |     |      |      |      |     |     |     |     |     |     |
|----------------------------------------------------------------------------------------------------------------------------------------------------------------|------|------|------|-----|-----|-----|------|------|-----|------|------|------|-----|-----|-----|-----|-----|-----|
| <i>d__Bacteria;k__norank;p__Proteobacteria;c__B<br/>etaproteobacteria;o__Burkholderiales;f__Coma<br/>monadaceae;g__Delftia</i>                                 | 14   | 35   | 33   | 8   | 3   | 12  | 12   | 7    | 4   | 20   | 46   | 12   | 15  | 5   | 2   | 9   | 12  | 12  |
| <i>d__Bacteria;k__norank;p__Proteobacteria;c__B<br/>etaproteobacteria;o__Burkholderiales;f__Coma<br/>monadaceae;g__Limnohabitans</i>                           | 0    | 6    | 0    | 0   | 0   | 0   | 0    | 0    | 0   | 0    | 0    | 0    | 0   | 0   | 0   | 0   | 0   | 0   |
| <i>d__Bacteria;k__norank;p__Proteobacteria;c__B<br/>etaproteobacteria;o__Burkholderiales;f__Coma<br/>monadaceae;g__Pelomonas</i>                               | 15   | 14   | 24   | 4   | 7   | 7   | 4    | 0    | 3   | 8    | 9    | 12   | 6   | 4   | 12  | 1   | 3   | 1   |
| <i>d__Bacteria;k__norank;p__Proteobacteria;c__B<br/>etaproteobacteria;o__Burkholderiales;f__Coma<br/>monadaceae;g__unclassified_f__Comamonadac<br/>eae</i>     | 7    | 0    | 4    | 0   | 1   | 1   | 0    | 3    | 1   | 0    | 6    | 0    | 1   | 0   | 0   | 0   | 1   | 1   |
| <i>d__Bacteria;k__norank;p__Proteobacteria;c__B<br/>etaproteobacteria;o__Burkholderiales;f__Oxalo<br/>bacteraceae;g__Massilia</i>                              | 10   | 1    | 0    | 0   | 0   | 0   | 1    | 1    | 0   | 0    | 3    | 3    | 2   | 3   | 3   | 2   | 0   | 0   |
| <i>d__Bacteria;k__norank;p__Proteobacteria;c__B<br/>etaproteobacteria;o__Burkholderiales;f__Oxalo<br/>bacteraceae;g__unclassified_f__Oxalobacterace<br/>ae</i> | 2262 | 2981 | 3483 | 648 | 840 | 850 | 1208 | 1163 | 425 | 1652 | 3749 | 1270 | 855 | 726 | 880 | 984 | 929 | 906 |
| <i>d__Bacteria;k__norank;p__Proteobacteria;c__B<br/>etaproteobacteria;o__Burkholderiales;f__Oxalo<br/>bacteraceae;g__Undibacterium</i>                         | 0    | 2    | 0    | 0   | 0   | 0   | 0    | 0    | 0   | 0    | 7    | 0    | 0   | 0   | 0   | 0   | 0   | 0   |
| <i>d__Bacteria;k__norank;p__Proteobacteria;c__B<br/>etaproteobacteria;o__Hydrogenophilales;f__Hy<br/>drogenophilaceae;g__Hydrogenophilus</i>                   | 0    | 0    | 0    | 0   | 0   | 0   | 0    | 0    | 0   | 0    | 13   | 0    | 0   | 0   | 2   | 0   | 0   | 0   |
| <i>d__Bacteria;k__norank;p__Proteobacteria;c__B<br/>etaproteobacteria;o__Neisseriales;f__Neisseriac<br/>eae;g__Eikenella</i>                                   | 0    | 0    | 0    | 0   | 0   | 0   | 0    | 1    | 0   | 1    | 12   | 0    | 0   | 0   | 0   | 0   | 0   | 0   |
| <i>d__Bacteria;k__norank;p__Proteobacteria;c__B<br/>etaproteobacteria;o__Neisseriales;f__Neisseriac<br/>eae;g__Neisseria</i>                                   | 7    | 2    | 6    | 5   | 9   | 1   | 15   | 0    | 14  | 2    | 91   | 10   | 12  | 12  | 5   | 5   | 25  | 9   |
| <i>d__Bacteria;k__norank;p__Proteobacteria;c__B<br/>etaproteobacteria;o__Neisseriales;f__Neisseriac<br/>eae;g__norank_f__Neisseriaceae</i>                     | 6    | 0    | 2    | 0   | 0   | 0   | 1    | 0    | 0   | 0    | 0    | 0    | 0   | 6   | 0   | 0   | 0   | 0   |
| <i>d__Bacteria;k__norank;p__Proteobacteria;c__B<br/>etaproteobacteria;o__Neisseriales;f__Neisseriac<br/>eae;g__unclassified_f__Neisseriaceae</i>               | 0    | 0    | 0    | 0   | 2   | 0   | 0    | 2    | 0   | 0    | 0    | 0    | 12  | 17  | 0   | 0   | 0   | 0   |



|                                                                                                                                                                                            |    |    |    |   |   |   |   |   |   |   |    |   |   |    |   |    |   |   |    |
|--------------------------------------------------------------------------------------------------------------------------------------------------------------------------------------------|----|----|----|---|---|---|---|---|---|---|----|---|---|----|---|----|---|---|----|
| <i>d__Bacteria;k__norank;p__Proteobacteria;c__Deltaproteobacteria;o__Myxococcales;f__Haliangiaceae;g__Haliangium</i>                                                                       | 0  | 7  | 0  | 0 | 0 | 0 | 0 | 0 | 0 | 0 | 0  | 0 | 0 | 0  | 0 | 0  | 0 | 0 |    |
| <i>d__Bacteria;k__norank;p__Proteobacteria;c__Deltaproteobacteria;o__Myxococcales;f__mle1-27;g__norank_f__mle1-27</i>                                                                      | 1  | 10 | 1  | 1 | 0 | 3 | 0 | 0 | 0 | 0 | 0  | 3 | 4 | 2  | 7 | 0  | 1 | 8 |    |
| <i>d__Bacteria;k__norank;p__Proteobacteria;c__Deltaproteobacteria;o__Myxococcales;f__Polyangiaceae;g__Sorangium</i>                                                                        | 0  | 0  | 3  | 0 | 0 | 0 | 1 | 1 | 0 | 0 | 6  | 3 | 0 | 2  | 0 | 0  | 0 | 0 |    |
| <i>d__Bacteria;k__norank;p__Proteobacteria;c__Deltaproteobacteria;o__Oligoflexales;f__0319-6G20;g__norank_f__0319-6G20</i>                                                                 | 12 | 2  | 12 | 3 | 3 | 2 | 2 | 2 | 0 | 2 | 13 | 1 | 2 | 14 | 4 | 7  | 4 | 5 |    |
| <i>d__Bacteria;k__norank;p__Proteobacteria;c__Deltaproteobacteria;o__Oligoflexales;f__Oligoflexaceae;g__norank_f__Oligoflexaceae</i>                                                       | 0  | 0  | 0  | 0 | 0 | 0 | 0 | 0 | 0 | 0 | 0  | 0 | 0 | 24 | 0 | 0  | 0 | 0 |    |
| <i>d__Bacteria;k__norank;p__Proteobacteria;c__Deltaproteobacteria;o__unclassified_c__Deltaproteobacteria;f__unclassified_c__Deltaproteobacteria;g__unclassified_c__Deltaproteobacteria</i> | 5  | 1  | 4  | 1 | 0 | 5 | 0 | 1 | 0 | 1 | 0  | 6 | 2 | 0  | 2 | 0  | 1 | 7 |    |
| <i>d__Bacteria;k__norank;p__Proteobacteria;c__Epsilonproteobacteria;o__Campylobacterales;f__Campylobacteraceae;g__Campylobacter</i>                                                        | 0  | 2  | 0  | 0 | 0 | 0 | 0 | 1 | 0 | 0 | 0  | 0 | 0 | 0  | 0 | 0  | 0 | 1 | 0  |
| <i>d__Bacteria;k__norank;p__Proteobacteria;c__Epsilonproteobacteria;o__Campylobacterales;f__Helicobacteraceae;g__Helicobacter</i>                                                          | 3  | 0  | 1  | 1 | 0 | 0 | 1 | 0 | 0 | 0 | 0  | 0 | 0 | 0  | 0 | 0  | 0 | 0 | 0  |
| <i>d__Bacteria;k__norank;p__Proteobacteria;c__Epsilonproteobacteria;o__Campylobacterales;f__Helicobacteraceae;g__Sulfuricurvum</i>                                                         | 0  | 0  | 0  | 0 | 1 | 0 | 0 | 0 | 0 | 0 | 0  | 0 | 0 | 0  | 0 | 0  | 0 | 0 | 11 |
| <i>d__Bacteria;k__norank;p__Proteobacteria;c__Epsilonproteobacteria;o__Campylobacterales;f__Helicobacteraceae;g__Sulfurimonas</i>                                                          | 0  | 1  | 0  | 0 | 0 | 0 | 0 | 0 | 0 | 0 | 1  | 0 | 2 | 1  | 2 | 0  | 2 | 0 |    |
| <i>d__Bacteria;k__norank;p__Proteobacteria;c__Gammaproteobacteria;o__Aeromonadales;f__Aeromonadaceae;g__Aeromonas</i>                                                                      | 3  | 0  | 0  | 0 | 0 | 0 | 2 | 1 | 4 | 0 | 0  | 0 | 2 | 12 | 0 | 11 | 0 | 0 |    |

|                                                                                                                                          |     |      |      |     |     |     |     |      |     |     |     |     |     |     |     |     |     |     |
|------------------------------------------------------------------------------------------------------------------------------------------|-----|------|------|-----|-----|-----|-----|------|-----|-----|-----|-----|-----|-----|-----|-----|-----|-----|
| <i>d__Bacteria;k__norank;p__Proteobacteria;c__Gammaproteobacteria;o__Aeromonadales;f__Succinivibrionaceae;g__Anaerobiospirillum</i>      | 0   | 0    | 9    | 0   | 0   | 0   | 0   | 0    | 0   | 0   | 0   | 0   | 0   | 0   | 0   | 0   | 0   | 0   |
| <i>d__Bacteria;k__norank;p__Proteobacteria;c__Gammaproteobacteria;o__Aeromonadales;f__Succinivibrionaceae;g__Succinivibrio</i>           | 1   | 5    | 3    | 1   | 1   | 0   | 0   | 1    | 0   | 0   | 0   | 0   | 0   | 0   | 0   | 0   | 0   | 0   |
| <i>d__Bacteria;k__norank;p__Proteobacteria;c__Gammaproteobacteria;o__Alteromonadales;f__Alteromonadaceae;g__Marinobacter</i>             | 5   | 0    | 0    | 0   | 0   | 0   | 0   | 0    | 0   | 0   | 0   | 0   | 0   | 0   | 0   | 0   | 0   | 0   |
| <i>d__Bacteria;k__norank;p__Proteobacteria;c__Gammaproteobacteria;o__Alteromonadales;f__Shewanellaceae;g__Shewanella</i>                 | 0   | 0    | 0    | 0   | 0   | 0   | 1   | 4    | 1   | 0   | 0   | 0   | 13  | 89  | 0   | 0   | 0   | 0   |
| <i>d__Bacteria;k__norank;p__Proteobacteria;c__Gammaproteobacteria;o__Cellvibrionales;f__Cellvibrionaceae;g__Simiduia</i>                 | 0   | 0    | 0    | 0   | 0   | 0   | 0   | 0    | 0   | 0   | 0   | 0   | 0   | 0   | 0   | 0   | 13  | 0   |
| <i>d__Bacteria;k__norank;p__Proteobacteria;c__Gammaproteobacteria;o__Enterobacteriales;f__Enterobacteriaceae;g__Escherichia-Shigella</i> | 94  | 141  | 223  | 20  | 33  | 41  | 143 | 126  | 128 | 75  | 153 | 127 | 243 | 180 | 174 | 85  | 103 | 175 |
| <i>d__Bacteria;k__norank;p__Proteobacteria;c__Gammaproteobacteria;o__Enterobacteriales;f__Enterobacteriaceae;g__Morganella</i>           | 9   | 0    | 0    | 0   | 0   | 0   | 0   | 0    | 0   | 0   | 0   | 0   | 7   | 0   | 0   | 0   | 0   | 0   |
| <i>d__Bacteria;k__norank;p__Proteobacteria;c__Gammaproteobacteria;o__Enterobacteriales;f__Enterobacteriaceae;g__Pantoea</i>              | 139 | 188  | 226  | 43  | 54  | 45  | 81  | 78   | 51  | 106 | 230 | 122 | 79  | 79  | 117 | 155 | 90  | 67  |
| <i>d__Bacteria;k__norank;p__Proteobacteria;c__Gammaproteobacteria;o__Legionellales;f__Legionellaceae;g__Legionella</i>                   | 3   | 2    | 4    | 0   | 0   | 0   | 1   | 0    | 0   | 0   | 6   | 4   | 0   | 0   | 1   | 0   | 0   | 0   |
| <i>d__Bacteria;k__norank;p__Proteobacteria;c__Gammaproteobacteria;o__Pasteurellales;f__Pasteurellaceae;g__Aggregatibacter</i>            | 0   | 1    | 0    | 0   | 0   | 3   | 0   | 2    | 0   | 0   | 18  | 0   | 0   | 0   | 0   | 0   | 0   | 5   |
| <i>d__Bacteria;k__norank;p__Proteobacteria;c__Gammaproteobacteria;o__Pasteurellales;f__Pasteurellaceae;g__Haemophilus</i>                | 0   | 8    | 4    | 3   | 0   | 3   | 1   | 1    | 5   | 1   | 14  | 3   | 0   | 2   | 2   | 2   | 2   | 14  |
| <i>d__Bacteria;k__norank;p__Proteobacteria;c__Gammaproteobacteria;o__Pseudomonadales;f__Moraxellaceae;g__Acinetobacter</i>               | 925 | 1322 | 1773 | 197 | 486 | 549 | 524 | 1073 | 256 | 923 | 933 | 551 | 611 | 337 | 432 | 248 | 529 | 543 |

|                                                                                                                                                                                            |     |     |     |     |     |     |     |     |     |     |     |     |     |      |     |     |     |     |
|--------------------------------------------------------------------------------------------------------------------------------------------------------------------------------------------|-----|-----|-----|-----|-----|-----|-----|-----|-----|-----|-----|-----|-----|------|-----|-----|-----|-----|
| <i>d__Bacteria;k__norank;p__Proteobacteria;c__Gammaproteobacteria;o__Pseudomonadales;f__Moraxellaceae;g__Enhydrobacter</i>                                                                 | 3   | 3   | 6   | 0   | 1   | 1   | 2   | 0   | 0   | 3   | 3   | 3   | 6   | 2    | 0   | 2   | 1   | 10  |
| <i>d__Bacteria;k__norank;p__Proteobacteria;c__Gammaproteobacteria;o__Pseudomonadales;f__Moraxellaceae;g__Moraxella</i>                                                                     | 0   | 0   | 5   | 0   | 0   | 1   | 0   | 0   | 2   | 0   | 8   | 0   | 1   | 0    | 0   | 0   | 1   | 2   |
| <i>d__Bacteria;k__norank;p__Proteobacteria;c__Gammaproteobacteria;o__Pseudomonadales;f__Moraxellaceae;g__Perlucidibaca</i>                                                                 | 0   | 0   | 9   | 0   | 0   | 0   | 0   | 0   | 0   | 0   | 0   | 0   | 0   | 0    | 0   | 0   | 0   | 0   |
| <i>d__Bacteria;k__norank;p__Proteobacteria;c__Gammaproteobacteria;o__Pseudomonadales;f__Pseudomonadaceae;g__Pseudomonas</i>                                                                | 463 | 682 | 833 | 167 | 153 | 149 | 255 | 225 | 117 | 295 | 786 | 385 | 206 | 200  | 190 | 160 | 282 | 100 |
| <i>d__Bacteria;k__norank;p__Proteobacteria;c__Gammaproteobacteria;o__Run-SP154;f__norank_o__Run-SP154;g__norank_o__Run-SP154</i>                                                           | 0   | 0   | 0   | 0   | 0   | 0   | 0   | 0   | 0   | 0   | 0   | 0   | 0   | 0    | 0   | 0   | 0   | 31  |
| <i>d__Bacteria;k__norank;p__Proteobacteria;c__Gammaproteobacteria;o__unclassified_c__Gammaproteobacteria;f__unclassified_c__Gammaproteobacteria;g__unclassified_c__Gammaproteobacteria</i> | 3   | 3   | 12  | 1   | 1   | 0   | 2   | 0   | 2   | 0   | 6   | 0   | 24  | 0    | 0   | 0   | 0   | 0   |
| <i>d__Bacteria;k__norank;p__Proteobacteria;c__Gammaproteobacteria;o__Vibrionales;f__Vibrionaceae;g__Photobacterium</i>                                                                     | 0   | 0   | 0   | 0   | 6   | 0   | 0   | 3   | 0   | 0   | 0   | 0   | 5   | 3541 | 0   | 0   | 18  | 0   |
| <i>d__Bacteria;k__norank;p__Proteobacteria;c__Gammaproteobacteria;o__Vibrionales;f__Vibrionaceae;g__Vibrio</i>                                                                             | 7   | 0   | 0   | 0   | 4   | 0   | 0   | 4   | 0   | 0   | 0   | 0   | 16  | 2689 | 1   | 0   | 12  | 10  |
| <i>d__Bacteria;k__norank;p__Proteobacteria;c__Gammaproteobacteria;o__Xanthomonadales;f__JTB255_marine_benthic_group;g__norank_f__JTB255_marine_benthic_group</i>                           | 0   | 0   | 9   | 0   | 0   | 0   | 0   | 0   | 0   | 0   | 0   | 0   | 0   | 0    | 0   | 0   | 0   | 0   |
| <i>d__Bacteria;k__norank;p__Proteobacteria;c__Gammaproteobacteria;o__Xanthomonadales;f__norank_o__Xanthomonadales;g__norank_o__Xanthomonadales</i>                                         | 0   | 4   | 2   | 0   | 0   | 1   | 0   | 0   | 0   | 0   | 1   | 0   | 0   | 0    | 0   | 0   | 0   | 0   |

|                                                                                                                                                                                                           |     |     |     |    |    |    |    |    |    |    |     |    |    |    |    |    |    |    |
|-----------------------------------------------------------------------------------------------------------------------------------------------------------------------------------------------------------|-----|-----|-----|----|----|----|----|----|----|----|-----|----|----|----|----|----|----|----|
| <i>d__Bacteria;k__norank;p__Proteobacteria;c__Gammaproteobacteria;o__Xanthomonadales;f__Xanthomonadaceae;g__Dokdonella</i>                                                                                | 6   | 0   | 0   | 0  | 0  | 0  | 0  | 0  | 0  | 0  | 1   | 0  | 0  | 3  | 0  | 0  | 0  | 0  |
| <i>d__Bacteria;k__norank;p__Proteobacteria;c__Gammaproteobacteria;o__Xanthomonadales;f__Xanthomonadaceae;g__Dyella</i>                                                                                    | 5   | 6   | 7   | 0  | 1  | 1  | 5  | 1  | 1  | 3  | 2   | 3  | 0  | 0  | 3  | 1  | 0  | 0  |
| <i>d__Bacteria;k__norank;p__Proteobacteria;c__Gammaproteobacteria;o__Xanthomonadales;f__Xanthomonadaceae;g__Ignatzschineria</i>                                                                           | 0   | 0   | 0   | 0  | 0  | 0  | 0  | 0  | 0  | 0  | 0   | 9  | 0  | 0  | 0  | 0  | 0  | 0  |
| <i>d__Bacteria;k__norank;p__Proteobacteria;c__Gammaproteobacteria;o__Xanthomonadales;f__Xanthomonadaceae;g__norank_f__Xanthomonadaceae</i>                                                                | 5   | 1   | 4   | 0  | 0  | 0  | 1  | 0  | 0  | 0  | 0   | 0  | 0  | 0  | 0  | 0  | 0  | 0  |
| <i>d__Bacteria;k__norank;p__Proteobacteria;c__Gammaproteobacteria;o__Xanthomonadales;f__Xanthomonadaceae;g__Stenotrophomonas</i>                                                                          | 144 | 141 | 233 | 31 | 40 | 65 | 65 | 45 | 35 | 69 | 167 | 58 | 49 | 66 | 73 | 56 | 30 | 47 |
| <i>d__Bacteria;k__norank;p__Proteobacteria;c__Gammaproteobacteria;o__Xanthomonadales;f__Xanthomonadaceae;g__Tahibacter</i>                                                                                | 0   | 0   | 0   | 0  | 0  | 0  | 0  | 1  | 1  | 0  | 0   | 0  | 3  | 0  | 0  | 0  | 0  | 0  |
| <i>d__Bacteria;k__norank;p__Proteobacteria;c__Gammaproteobacteria;o__Xanthomonadales;f__Xanthomonadaceae;g__Thermomonas</i>                                                                               | 22  | 31  | 27  | 1  | 9  | 7  | 4  | 4  | 3  | 17 | 27  | 8  | 8  | 3  | 7  | 2  | 2  | 12 |
| <i>d__Bacteria;k__norank;p__Proteobacteria;c__Gammaproteobacteria;o__Xanthomonadales;f__Xanthomonadaceae;g__unclassified_f__Xanthomonadaceae</i>                                                          | 0   | 13  | 0   | 2  | 0  | 0  | 0  | 0  | 0  | 0  | 0   | 1  | 0  | 0  | 0  | 0  | 0  | 0  |
| <i>d__Bacteria;k__norank;p__Proteobacteria;c__Proteobacteria_Incertae_Sedis;o__Unknown_c__Proteobacteria_Incertae_Sedis;f__Unknown_o__Unknown_c__Proteobacteria_Incertae_Sedis;g__Candidatus_Thiobios</i> | 0   | 0   | 0   | 0  | 0  | 0  | 0  | 0  | 0  | 0  | 0   | 0  | 13 | 0  | 0  | 0  | 0  | 0  |
| <i>d__Bacteria;k__norank;p__Saccharibacteria;c__norank_p__Saccharibacteria;o__norank_p__Saccharibacteria;f__norank_p__Saccharibacteria;g__norank_p__Saccharibacteria</i>                                  | 1   | 0   | 2   | 1  | 0  | 1  | 2  | 2  | 0  | 3  | 0   | 0  | 1  | 19 | 1  | 0  | 0  | 29 |





|                                                                                                                                                                |    |    |    |    |    |    |   |   |    |   |   |   |   |     |   |   |   |    |
|----------------------------------------------------------------------------------------------------------------------------------------------------------------|----|----|----|----|----|----|---|---|----|---|---|---|---|-----|---|---|---|----|
| <i>d__Bacteria;k__norank;p__unclassified_k__norank;c__unclassified_k__norank;o__unclassified_k__norank;f__unclassified_k__norank;g__unclassified_k__norank</i> | 12 | 10 | 17 | 12 | 14 | 24 | 6 | 7 | 20 | 1 | 8 | 1 | 3 | 3   | 4 | 1 | 4 | 38 |
| <i>d__Bacteria;k__norank;p__Verrucomicrobia;c__Spartobacteria;o__Chthoniobacterales;f__LD29;g__norank_f__LD29</i>                                              | 0  | 0  | 0  | 0  | 0  | 0  | 0 | 0 | 0  | 0 | 0 | 0 | 3 | 108 | 0 | 0 | 0 | 0  |
| <i>d__Bacteria;k__norank;p__Verrucomicrobia;c__Verrucomicrobiae;o__Verrucomicrobiales;f__Verrucomicrobiaceae;g__Akkermansia</i>                                | 1  | 2  | 3  | 0  | 0  | 5  | 0 | 1 | 1  | 0 | 0 | 0 | 6 | 0   | 2 | 0 | 0 | 0  |
| <i>d__Bacteria;k__norank;p__WS6;c__norank_p__WS6;o__norank_p__WS6;f__norank_p__WS6;g__norank_p__WS6</i>                                                        | 0  | 0  | 0  | 0  | 0  | 0  | 0 | 0 | 0  | 0 | 0 | 0 | 0 | 9   | 0 | 0 | 8 | 0  |
| <i>d__Bacteria;k__norank;p__WWE3;c__norank_p__WWE3;o__norank_p__WWE3;f__norank_p__WWE3;g__norank_p__WWE3</i>                                                   | 0  | 0  | 0  | 0  | 0  | 0  | 0 | 0 | 0  | 0 | 0 | 0 | 0 | 18  | 0 | 0 | 0 | 0  |

---

**Table S4.** Correlation between HA and microorganisms on genus level.

| HA          | Microorganisms                      | P value | P adjust | correlation |
|-------------|-------------------------------------|---------|----------|-------------|
| 1-Dodecanol | <i>Anaerotruncus</i>                | 0.050   | 0.566    | (0.812)     |
|             | <i>Candidatus_Thiobios</i>          | 0.044   | 0.520    | 0.824       |
|             | <i>CL500-29_marine_group</i>        | 0.044   | 0.520    | 0.824       |
|             | <i>CL500-3</i>                      | 0.044   | 0.520    | 0.824       |
|             | <i>Clostridium_sensu_stricto_13</i> | 0.030   | 0.453    | 0.854       |
|             | <i>Deinococcus</i>                  | 0.019   | 0.340    | 0.884       |
|             | <i>Ezakiella</i>                    | 0.044   | 0.520    | 0.824       |
|             | <i>Fastidiosipila</i>               | 0.044   | 0.520    | 0.824       |
|             | <i>Flectobacillus</i>               | 0.044   | 0.520    | 0.824       |
|             | <i>Gallicola</i>                    | 0.044   | 0.520    | 0.824       |
|             | <i>hgcI_clade</i>                   | 0.044   | 0.520    | 0.824       |
|             | <i>Hirschia</i>                     | 0.044   | 0.520    | 0.824       |
|             | <i>Ilumatobacter</i>                | 0.022   | 0.377    | 0.875       |
|             | <i>Kocuria</i>                      | 0.034   | 0.474    | 0.846       |
|             | <i>Lachnoclostridium</i>            | 0.037   | 0.490    | 0.838       |
|             | <i>Neorickettsia</i>                | 0.044   | 0.520    | 0.824       |
|             | <i>norank_c_vadinHA49</i>           | 0.044   | 0.520    | 0.824       |
|             | <i>norank_f_Caldilineaceae</i>      | 0.045   | 0.532    | 0.821       |
|             | <i>norank_f_FamilyI</i>             | 0.020   | 0.341    | 0.884       |
|             | <i>norank_f_LD29</i>                | 0.044   | 0.520    | 0.824       |
|             | <i>norank_f_Leptotrichiaceae</i>    | 0.044   | 0.520    | 0.824       |
|             | <i>norank_f_Mycoplasmataceae</i>    | 0.044   | 0.520    | 0.824       |
|             | <i>norank_f_Oligoflexaceae</i>      | 0.044   | 0.520    | 0.824       |
|             | <i>norank_f_OPB56</i>               | 0.044   | 0.520    | 0.824       |

|                |                                               |       |       |         |
|----------------|-----------------------------------------------|-------|-------|---------|
|                | <i>norank_p_Latescibacteria</i>               | 0.044 | 0.520 | 0.824   |
|                | <i>norank_p_WWE3</i>                          | 0.044 | 0.520 | 0.824   |
|                | <i>Pediococcus</i>                            | 0.023 | 0.386 | 0.873   |
|                | <i>Pedomicrobium</i>                          | 0.039 | 0.509 | 0.834   |
|                | <i>Peptoniphilus</i>                          | 0.037 | 0.490 | 0.838   |
|                | <i>Photobacterium</i>                         | 0.043 | 0.520 | 0.825   |
|                | <i>Propionigenium</i>                         | 0.044 | 0.520 | 0.824   |
|                | <i>Rubribacterium</i>                         | 0.044 | 0.520 | 0.824   |
|                | <i>Ruminiclostridium_I</i>                    | 0.044 | 0.520 | 0.824   |
|                | <i>Sediminibacterium</i>                      | 0.044 | 0.520 | 0.824   |
|                | <i>Sphaerochaeta</i>                          | 0.044 | 0.520 | 0.824   |
|                | <i>Spongiimonas</i>                           | 0.044 | 0.520 | 0.824   |
|                | <i>Sulfurimonas</i>                           | 0.013 | 0.261 | 0.905   |
|                | <i>Sva0081_sediment_group</i>                 | 0.044 | 0.520 | 0.824   |
|                | <i>unclassified_f_FamilyI_o_SubsectionI</i>   | 0.044 | 0.520 | 0.824   |
|                | <i>unclassified_f_FamilyI_o_SubsectionIII</i> | 0.018 | 0.322 | 0.889   |
|                | <i>unclassified_f_Flavobacteriaceae</i>       | 0.044 | 0.520 | 0.824   |
|                | <i>Vibrio</i>                                 | 0.043 | 0.520 | 0.825   |
| 1-Heptadecanol | <i>[Eubacterium]_nodatum_group</i>            | 0.006 | 0.152 | 0.937   |
|                | <i>Bradyrhizobium</i>                         | 0.017 | 0.306 | (0.893) |
|                | <i>Cellulosimicrobium</i>                     | 0.010 | 0.212 | (0.919) |
|                | <i>Cloacibacterium</i>                        | 0.010 | 0.218 | (0.916) |
|                | <i>Enhydrobacter</i>                          | 0.013 | 0.260 | (0.905) |
|                | <i>Micrococcus</i>                            | 0.038 | 0.493 | (0.837) |
|                | <i>norank_c_Cyanobacteria</i>                 | 0.028 | 0.438 | (0.859) |
|                | <i>norank_f_0319-6G20</i>                     | 0.042 | 0.520 | (0.828) |

|               |                                     |       |       |         |
|---------------|-------------------------------------|-------|-------|---------|
|               | <i>Rhodococcus</i>                  | 0.020 | 0.344 | (0.883) |
| 1-Hexacosanol | <i>[Eubacterium]_hallii_group</i>   | 0.004 | 0.113 | 0.948   |
|               | <i>Abiotrophia</i>                  | 0.000 | 0.000 | 0.999   |
|               | <i>Acidisoma</i>                    | 0.019 | 0.333 | 0.886   |
|               | <i>Aggregatibacter</i>              | 0.012 | 0.250 | 0.908   |
|               | <i>Bosea</i>                        | 0.015 | 0.283 | 0.899   |
|               | <i>Capnocytophaga</i>               | 0.009 | 0.203 | 0.922   |
|               | <i>Caulobacter</i>                  | 0.010 | 0.221 | 0.916   |
|               | <i>Eikenella</i>                    | 0.006 | 0.155 | 0.936   |
|               | <i>Gemella</i>                      | 0.024 | 0.394 | 0.871   |
|               | <i>Geobacillus</i>                  | 0.000 | 0.025 | 0.982   |
|               | <i>Hydrogenophilus</i>              | 0.001 | 0.031 | 0.977   |
|               | <i>Ignatzschineria</i>              | 0.004 | 0.113 | 0.948   |
|               | <i>Neisseria</i>                    | 0.002 | 0.068 | 0.963   |
|               | <i>norank_f_Erysipelotrichaceae</i> | 0.040 | 0.511 | (0.833) |
|               | <i>norank_f_I-10</i>                | 0.011 | 0.234 | 0.912   |
|               | <i>Porphyromonas</i>                | 0.030 | 0.453 | 0.854   |
|               | <i>Pseudolabrys</i>                 | 0.015 | 0.288 | 0.898   |
|               | <i>Pseudonocardia</i>               | 0.004 | 0.113 | 0.948   |
|               | <i>Sorangium</i>                    | 0.027 | 0.431 | 0.862   |
|               | <i>unclassified_f_Rikenellaceae</i> | 0.003 | 0.088 | 0.956   |
|               | <i>Undibacterium</i>                | 0.026 | 0.412 | 0.866   |
|               | <i>Veillonella</i>                  | 0.006 | 0.150 | 0.937   |
| 1-Hexadecanol | <i>Candidatus_Bacilloplasma</i>     | 0.041 | 0.520 | 0.829   |
|               | <i>Candidatus_Thiobios</i>          | 0.035 | 0.474 | 0.843   |
|               | <i>CL500-29_marine_group</i>        | 0.035 | 0.474 | 0.843   |

|                                  |       |       |       |
|----------------------------------|-------|-------|-------|
| <i>CL500-3</i>                   | 0.035 | 0.474 | 0.843 |
| <i>Deinococcus</i>               | 0.032 | 0.472 | 0.849 |
| <i>Ezakiella</i>                 | 0.035 | 0.474 | 0.843 |
| <i>Fastidiosipila</i>            | 0.035 | 0.474 | 0.843 |
| <i>Flectobacillus</i>            | 0.035 | 0.474 | 0.843 |
| <i>Gallicola</i>                 | 0.035 | 0.474 | 0.843 |
| <i>hgcI_clade</i>                | 0.035 | 0.474 | 0.843 |
| <i>Hirschia</i>                  | 0.035 | 0.474 | 0.843 |
| <i>Ilumatobacter</i>             | 0.029 | 0.444 | 0.858 |
| <i>Kocuria</i>                   | 0.009 | 0.209 | 0.920 |
| <i>Lachnoclostridium</i>         | 0.031 | 0.461 | 0.852 |
| <i>Neorickettsia</i>             | 0.035 | 0.474 | 0.843 |
| <i>norank_c_vadinHA49</i>        | 0.035 | 0.474 | 0.843 |
| <i>norank_f_Caldilineaceae</i>   | 0.036 | 0.478 | 0.841 |
| <i>norank_f_FamilyI</i>          | 0.005 | 0.128 | 0.944 |
| <i>norank_f_LD29</i>             | 0.035 | 0.474 | 0.843 |
| <i>norank_f_Leptotrichiaceae</i> | 0.035 | 0.474 | 0.843 |
| <i>norank_f_Mycoplasmataceae</i> | 0.035 | 0.474 | 0.843 |
| <i>norank_f_Oligoflexaceae</i>   | 0.035 | 0.474 | 0.843 |
| <i>norank_f_OPB56</i>            | 0.035 | 0.474 | 0.843 |
| <i>norank_o_PeM15</i>            | 0.043 | 0.520 | 0.825 |
| <i>norank_p_Latescibacteria</i>  | 0.035 | 0.474 | 0.843 |
| <i>norank_p_WWE3</i>             | 0.035 | 0.474 | 0.843 |
| <i>Pediococcus</i>               | 0.014 | 0.273 | 0.901 |
| <i>Pedomicrobium</i>             | 0.014 | 0.276 | 0.901 |
| <i>Peptoniphilus</i>             | 0.029 | 0.440 | 0.859 |

|                |                                               |       |       |         |
|----------------|-----------------------------------------------|-------|-------|---------|
|                | <i>Photobacterium</i>                         | 0.035 | 0.474 | 0.843   |
|                | <i>Propionigenium</i>                         | 0.035 | 0.474 | 0.843   |
|                | <i>Rubribacterium</i>                         | 0.035 | 0.474 | 0.843   |
|                | <i>Ruminiclostridium_I</i>                    | 0.035 | 0.474 | 0.843   |
|                | <i>Sediminibacterium</i>                      | 0.035 | 0.474 | 0.843   |
|                | <i>Shewanella</i>                             | 0.039 | 0.509 | 0.833   |
|                | <i>Spongiimonas</i>                           | 0.035 | 0.474 | 0.843   |
|                | <i>Sulfurimonas</i>                           | 0.018 | 0.329 | 0.887   |
|                | <i>Sva0081_sediment_group</i>                 | 0.035 | 0.474 | 0.843   |
|                | <i>Synechococcus</i>                          | 0.040 | 0.517 | 0.831   |
|                | <i>Thermus</i>                                | 0.042 | 0.520 | 0.827   |
|                | <i>unclassified_f_FamilyI_o_SubsectionI</i>   | 0.035 | 0.474 | 0.843   |
|                | <i>unclassified_f_FamilyI_o_SubsectionIII</i> | 0.009 | 0.203 | 0.922   |
|                | <i>unclassified_f_Flavobacteriaceae</i>       | 0.035 | 0.474 | 0.843   |
|                | <i>unclassified_f_Neisseriaceae</i>           | 0.048 | 0.557 | 0.815   |
|                | <i>unclassified_k_norank</i>                  | 0.041 | 0.518 | (0.830) |
|                | <i>Vibrio</i>                                 | 0.035 | 0.474 | 0.843   |
| 1-Triacontanol | <i>[Eubacterium]_hallii_group</i>             | 0.005 | 0.131 | 0.942   |
|                | <i>Abiotrophia</i>                            | 0.000 | 0.007 | 0.992   |
|                | <i>Acidisoma</i>                              | 0.019 | 0.339 | 0.884   |
|                | <i>Aggregatibacter</i>                        | 0.023 | 0.378 | 0.874   |
|                | <i>Bosea</i>                                  | 0.010 | 0.214 | 0.918   |
|                | <i>Capnocytophaga</i>                         | 0.011 | 0.227 | 0.914   |
|                | <i>Caulobacter</i>                            | 0.007 | 0.176 | 0.930   |
|                | <i>Cetobacterium</i>                          | 0.035 | 0.474 | 0.842   |
|                | <i>Eikenella</i>                              | 0.007 | 0.175 | 0.931   |

|                            |                                      |       |       |         |
|----------------------------|--------------------------------------|-------|-------|---------|
|                            | <i>Gemella</i>                       | 0.023 | 0.387 | 0.873   |
|                            | <i>Geobacillus</i>                   | 0.001 | 0.032 | 0.977   |
|                            | <i>Hydrogenophilus</i>               | 0.001 | 0.025 | 0.981   |
|                            | <i>Ignatzschineria</i>               | 0.005 | 0.131 | 0.942   |
|                            | <i>Neisseria</i>                     | 0.005 | 0.133 | 0.942   |
|                            | <i>norank_f_I-10</i>                 | 0.025 | 0.404 | 0.868   |
|                            | <i>Porphyromonas</i>                 | 0.033 | 0.474 | 0.847   |
|                            | <i>Pseudolabrys</i>                  | 0.018 | 0.322 | 0.888   |
|                            | <i>Pseudonocardia</i>                | 0.005 | 0.131 | 0.942   |
|                            | <i>Sorangium</i>                     | 0.019 | 0.331 | 0.886   |
|                            | <i>unclassified_f_Rikenellaceae</i>  | 0.001 | 0.025 | 0.981   |
|                            | <i>Undibacterium</i>                 | 0.024 | 0.397 | 0.870   |
|                            | <i>Veillonella</i>                   | 0.010 | 0.217 | 0.917   |
|                            | <i>Vibrionimonas</i>                 | 0.043 | 0.520 | 0.826   |
| 1-Undecanol                | <i>norank_o_JG30-KF-CM45</i>         | 0.001 | 0.036 | 0.975   |
|                            | <i>Truepera</i>                      | 0.000 | 0.001 | 0.997   |
| 2-(2-butoxyethoxy)-Ethanol | <i>[Eubacterium]_eligens_group</i>   | 0.042 | 0.520 | (0.827) |
|                            | <i>Anaerococcus</i>                  | 0.029 | 0.444 | 0.858   |
|                            | <i>Anaerotruncus</i>                 | 0.029 | 0.448 | (0.857) |
|                            | <i>Filifactor</i>                    | 0.035 | 0.474 | 0.843   |
|                            | <i>Finegoldia</i>                    | 0.019 | 0.338 | 0.885   |
|                            | <i>Lachnospiraceae_NK4A136_group</i> | 0.049 | 0.562 | (0.813) |
|                            | <i>norank_p_Saccharibacteria</i>     | 0.009 | 0.209 | 0.920   |
|                            | <i>norank_p_WS6</i>                  | 0.028 | 0.433 | 0.861   |
|                            | <i>Prevotella</i>                    | 0.045 | 0.525 | 0.822   |
| 2-ethyl-1-Hexanol          | <i>[Eubacterium]_nodatum_group</i>   | 0.047 | 0.540 | 0.818   |



|                             |                                              |       |       |         |
|-----------------------------|----------------------------------------------|-------|-------|---------|
|                             | <i>Achromobacter</i>                         | 0.042 | 0.520 | (0.827) |
|                             | <i>Bradyrhizobium</i>                        | 0.008 | 0.188 | (0.926) |
|                             | <i>Cellulosimicrobium</i>                    | 0.026 | 0.420 | (0.865) |
|                             | <i>Cloacibacterium</i>                       | 0.004 | 0.118 | (0.947) |
|                             | <i>Enhydrobacter</i>                         | 0.009 | 0.209 | (0.920) |
|                             | <i>Micrococcus</i>                           | 0.032 | 0.463 | (0.851) |
|                             | <i>norank_c_Cyanobacteria</i>                | 0.045 | 0.532 | (0.821) |
|                             | <i>norank_f_0319-6G20</i>                    | 0.020 | 0.344 | (0.882) |
|                             | <i>Paracoccus</i>                            | 0.040 | 0.510 | (0.833) |
|                             | <i>Rhodococcus</i>                           | 0.017 | 0.310 | (0.892) |
| 2-ethyl-2-methyl-Tridecanol | <i>Anaerotruncus</i>                         | 0.034 | 0.474 | (0.847) |
|                             | <i>Bradyrhizobium</i>                        | 0.037 | 0.493 | 0.837   |
|                             | <i>Cloacibacterium</i>                       | 0.046 | 0.534 | 0.820   |
|                             | <i>Clostridium_sensu_stricto_13</i>          | 0.007 | 0.175 | 0.931   |
|                             | <i>Deinococcus</i>                           | 0.010 | 0.218 | 0.917   |
|                             | <i>Granulicatella</i>                        | 0.027 | 0.425 | 0.863   |
|                             | <i>Ilumatobacter</i>                         | 0.022 | 0.365 | 0.878   |
|                             | <i>norank_p_Saccharibacteria</i>             | 0.047 | 0.546 | 0.817   |
|                             | <i>norank_p_WS6</i>                          | 0.012 | 0.237 | 0.911   |
|                             | <i>Sulfurimonas</i>                          | 0.009 | 0.209 | 0.920   |
| 2-Furanmethanol             | <i>[Eubacterium]_coprostanoligenes_group</i> | 0.001 | 0.048 | 0.970   |
|                             | <i>Acinetobacter</i>                         | 0.013 | 0.257 | 0.906   |
|                             | <i>Alistipes</i>                             | 0.000 | 0.000 | 0.998   |
|                             | <i>Alloprevotella</i>                        | 0.001 | 0.028 | 0.978   |
|                             | <i>Anaerobiospirillum</i>                    | 0.000 | 0.000 | 0.999   |
|                             | <i>Anaerostipes</i>                          | 0.010 | 0.218 | 0.916   |

|                                      |       |       |       |
|--------------------------------------|-------|-------|-------|
| <i>Aspergillus</i>                   | 0.000 | 0.005 | 0.993 |
| <i>Bacillus</i>                      | 0.002 | 0.071 | 0.962 |
| <i>Blautia</i>                       | 0.010 | 0.217 | 0.917 |
| <i>Burkholderia-Paraburkholderia</i> | 0.030 | 0.453 | 0.855 |
| <i>Candidatus_Saccharimonas</i>      | 0.000 | 0.000 | 0.999 |
| <i>Catenibacterium</i>               | 0.000 | 0.021 | 0.984 |
| <i>Christensenellaceae_R-7_group</i> | 0.007 | 0.176 | 0.929 |
| <i>Chroococciopsis</i>               | 0.016 | 0.294 | 0.896 |
| <i>Clostridium_sensu_stricto_15</i>  | 0.001 | 0.037 | 0.975 |
| <i>Coprococcus_3</i>                 | 0.004 | 0.113 | 0.949 |
| <i>Desulfovibrio</i>                 | 0.000 | 0.007 | 0.991 |
| <i>Devosia</i>                       | 0.000 | 0.000 | 0.999 |
| <i>Dialister</i>                     | 0.002 | 0.056 | 0.967 |
| <i>Dokdonella</i>                    | 0.025 | 0.407 | 0.867 |
| <i>Dyella</i>                        | 0.016 | 0.300 | 0.894 |
| <i>Enorma</i>                        | 0.000 | 0.000 | 0.999 |
| <i>Enterococcus</i>                  | 0.000 | 0.010 | 0.990 |
| <i>Erysipelotrichaceae_UCG-002</i>   | 0.027 | 0.423 | 0.864 |
| <i>Faecalibacterium</i>              | 0.000 | 0.016 | 0.986 |
| <i>Faecalibaculum</i>                | 0.031 | 0.453 | 0.854 |
| <i>Family_XIII_AD3011_group</i>      | 0.004 | 0.118 | 0.947 |
| <i>Haliangium</i>                    | 0.000 | 0.000 | 0.999 |
| <i>Helicobacter</i>                  | 0.003 | 0.080 | 0.958 |
| <i>Holdemanella</i>                  | 0.002 | 0.053 | 0.968 |
| <i>Inquilinus</i>                    | 0.000 | 0.000 | 0.999 |
| <i>Kroppenstedtia</i>                | 0.007 | 0.176 | 0.930 |

|                                               |       |       |         |
|-----------------------------------------------|-------|-------|---------|
| <i>Lachnospiraceae_UCG-010</i>                | 0.000 | 0.000 | 0.999   |
| <i>Lactococcus</i>                            | 0.041 | 0.518 | (0.831) |
| <i>Lawsonella</i>                             | 0.001 | 0.048 | 0.970   |
| <i>Limnohabitans</i>                          | 0.000 | 0.000 | 0.999   |
| <i>Marinobacter</i>                           | 0.000 | 0.000 | 0.999   |
| <i>Marvinbryantia</i>                         | 0.015 | 0.286 | 0.898   |
| <i>Megasphaera</i>                            | 0.015 | 0.286 | 0.898   |
| <i>Microlunatus</i>                           | 0.012 | 0.242 | 0.910   |
| <i>Mycobacterium</i>                          | 0.012 | 0.248 | 0.909   |
| <i>Nakamurella</i>                            | 0.001 | 0.045 | 0.972   |
| <i>Nitrolancea</i>                            | 0.001 | 0.048 | 0.970   |
| <i>Nitrospira</i>                             | 0.014 | 0.267 | 0.903   |
| <i>norank_c_Acidobacteria</i>                 | 0.003 | 0.093 | 0.955   |
| <i>norank_c_Bacteroidetes_BD2-2</i>           | 0.000 | 0.000 | 0.999   |
| <i>norank_c_Bacteroidetes_VC2.1_Bac22</i>     | 0.000 | 0.000 | 0.999   |
| <i>norank_c_BD7-11</i>                        | 0.001 | 0.033 | 0.977   |
| <i>norank_f_Acidimicrobiaceae</i>             | 0.000 | 0.000 | 0.999   |
| <i>norank_f_Acidobacteriaceae_Subgroup_1</i>  | 0.000 | 0.000 | 0.999   |
| <i>norank_f_Actinopolysporaceae</i>           | 0.026 | 0.415 | 0.866   |
| <i>norank_f_B79</i>                           | 0.003 | 0.100 | 0.952   |
| <i>norank_f_Bacteroidales_BS11_gut_group</i>  | 0.008 | 0.179 | 0.928   |
| <i>norank_f_Bacteroidales_S24-7_group</i>     | 0.002 | 0.065 | 0.964   |
| <i>norank_f_Bacteroidales_UCG-001</i>         | 0.024 | 0.392 | 0.871   |
| <i>norank_f_Chitinophagaceae</i>              | 0.000 | 0.004 | 0.994   |
| <i>norank_f_Clostridiales_vadinBB60_group</i> | 0.000 | 0.000 | 0.999   |
| <i>norank_f_Gemmatimonadaceae</i>             | 0.000 | 0.000 | 0.999   |

|                                             |       |       |       |
|---------------------------------------------|-------|-------|-------|
| <i>norank_f_JTB255_marine_benthic_group</i> | 0.000 | 0.000 | 0.999 |
| <i>norank_f_Lachnospiraceae</i>             | 0.017 | 0.317 | 0.890 |
| <i>norank_f_MNG7</i>                        | 0.030 | 0.453 | 0.854 |
| <i>norank_f_MSB-1E8</i>                     | 0.038 | 0.495 | 0.837 |
| <i>norank_f_Nitrosomonadaceae</i>           | 0.001 | 0.025 | 0.982 |
| <i>norank_f_Rhodospirillaceae</i>           | 0.001 | 0.028 | 0.979 |
| <i>norank_f_Xanthomonadaceae</i>            | 0.000 | 0.003 | 0.996 |
| <i>norank_f_XIII</i>                        | 0.000 | 0.000 | 0.999 |
| <i>norank_o_AKYG1722</i>                    | 0.000 | 0.000 | 0.999 |
| <i>norank_o_Gaiellales</i>                  | 0.030 | 0.453 | 0.854 |
| <i>norank_o_Limnochordales</i>              | 0.000 | 0.000 | 0.999 |
| <i>norank_o_Obscuribacterales</i>           | 0.000 | 0.013 | 0.988 |
| <i>norank_o_Subgroup_7</i>                  | 0.000 | 0.000 | 0.999 |
| <i>norank_o_TRA3-20</i>                     | 0.011 | 0.226 | 0.914 |
| <i>norank_o_Xanthomonadales</i>             | 0.001 | 0.025 | 0.980 |
| <i>norank_p_Parcubacteria</i>               | 0.013 | 0.260 | 0.905 |
| <i>norank_p_TM6_Dependentiae</i>            | 0.000 | 0.000 | 0.999 |
| <i>Oceanobacillus</i>                       | 0.010 | 0.212 | 0.919 |
| <i>Odoribacter</i>                          | 0.012 | 0.248 | 0.908 |
| <i>Oribacterium</i>                         | 0.003 | 0.080 | 0.958 |
| <i>Oscillibacter</i>                        | 0.006 | 0.151 | 0.937 |
| <i>Paenibacillus</i>                        | 0.034 | 0.474 | 0.846 |
| <i>Papillibacter</i>                        | 0.000 | 0.000 | 0.999 |
| <i>Parabacteroides</i>                      | 0.000 | 0.005 | 0.993 |
| <i>Pelomonas</i>                            | 0.031 | 0.459 | 0.852 |
| <i>Perlucidibaca</i>                        | 0.000 | 0.000 | 0.999 |

|                                    |       |       |         |
|------------------------------------|-------|-------|---------|
| <i>Phascolarctobacterium</i>       | 0.021 | 0.356 | 0.880   |
| <i>Prevotella_1</i>                | 0.001 | 0.032 | 0.977   |
| <i>Prevotella_9</i>                | 0.007 | 0.175 | 0.930   |
| <i>Prevotellaceae_NK3B31_group</i> | 0.001 | 0.045 | 0.972   |
| <i>Prevotellaceae_UCG-001</i>      | 0.001 | 0.025 | 0.981   |
| <i>Prevotellaceae_UCG-003</i>      | 0.000 | 0.002 | 0.997   |
| <i>Pseudoclavibacter</i>           | 0.005 | 0.129 | 0.943   |
| <i>Pyramidobacter</i>              | 0.000 | 0.000 | 0.999   |
| <i>Ralstonia</i>                   | 0.004 | 0.106 | 0.951   |
| <i>Rikenellaceae_RC9_gut_group</i> | 0.002 | 0.065 | 0.964   |
| <i>Rubellimicrobium</i>            | 0.024 | 0.395 | 0.870   |
| <i>Ruminococcaceae_UCG-002</i>     | 0.010 | 0.214 | 0.918   |
| <i>Ruminococcaceae_UCG-007</i>     | 0.000 | 0.000 | 0.999   |
| <i>Ruminococcaceae_UCG-010</i>     | 0.000 | 0.000 | 0.999   |
| <i>Ruminococcaceae_UCG-011</i>     | 0.007 | 0.176 | 0.929   |
| <i>Ruminococcus_1</i>              | 0.000 | 0.001 | 0.998   |
| <i>Ruminococcus_2</i>              | 0.002 | 0.072 | 0.961   |
| <i>Saccharomyces</i>               | 0.014 | 0.278 | (0.900) |
| <i>Saccharopolyspora</i>           | 0.002 | 0.068 | 0.963   |
| <i>Sedimentibacter</i>             | 0.000 | 0.000 | 0.999   |
| <i>Selenomonas</i>                 | 0.000 | 0.004 | 0.994   |
| <i>Sphingomonas</i>                | 0.049 | 0.561 | 0.814   |
| <i>Stenotrophomonas</i>            | 0.012 | 0.248 | 0.908   |
| <i>Streptococcus</i>               | 0.016 | 0.300 | 0.894   |
| <i>Streptomyces</i>                | 0.029 | 0.444 | 0.858   |
| <i>Subdoligranulum</i>             | 0.000 | 0.020 | 0.984   |

|                                 |                                           |       |       |         |
|---------------------------------|-------------------------------------------|-------|-------|---------|
|                                 | <i>Succinivibrio</i>                      | 0.001 | 0.025 | 0.981   |
|                                 | <i>Thalassobacillus</i>                   | 0.000 | 0.000 | 0.999   |
|                                 | <i>Thermomonas</i>                        | 0.038 | 0.495 | 0.837   |
|                                 | <i>Treponema_2</i>                        | 0.022 | 0.377 | 0.875   |
|                                 | <i>Tyzzerella_3</i>                       | 0.000 | 0.000 | 0.999   |
|                                 | <i>unclassified_f_Comamonadaceae</i>      | 0.023 | 0.378 | 0.875   |
|                                 | <i>unclassified_f_Coriobacteriaceae</i>   | 0.000 | 0.000 | 0.999   |
|                                 | <i>unclassified_f_Microbacteriaceae</i>   | 0.000 | 0.000 | 0.999   |
|                                 | <i>unclassified_f_Nocardioideaceae</i>    | 0.000 | 0.000 | 0.999   |
|                                 | <i>unclassified_f_Prevotellaceae</i>      | 0.000 | 0.007 | 0.991   |
|                                 | <i>unclassified_f_Xanthobacteraceae</i>   | 0.035 | 0.474 | 0.842   |
|                                 | <i>unclassified_f_Xanthomonadaceae</i>    | 0.000 | 0.008 | 0.991   |
|                                 | <i>unclassified_o_Chlamydiales</i>        | 0.000 | 0.000 | 0.999   |
|                                 | <i>unclassified_o_Solirubrobacterales</i> | 0.000 | 0.000 | 0.999   |
| 2-Isopropyl-5-methyl-1-heptanol | <i>Bradyrhizobium</i>                     | 0.025 | 0.401 | (0.869) |
|                                 | <i>Cloacibacterium</i>                    | 0.020 | 0.341 | (0.883) |
|                                 | <i>Enhydrobacter</i>                      | 0.037 | 0.492 | (0.838) |
|                                 | <i>norank_f_0319-6G20</i>                 | 0.028 | 0.433 | (0.861) |
|                                 | <i>norank_o_JG30-KF-CM45</i>              | 0.032 | 0.463 | 0.851   |
|                                 | <i>Truepera</i>                           | 0.007 | 0.177 | 0.929   |
| 2-methyl-1-Propanol             | <i>Acidothermus</i>                       | 0.000 | 0.000 | 1.000   |
|                                 | <i>Anaerococcus</i>                       | 0.000 | 0.020 | 0.984   |
|                                 | <i>Bdellovibrio</i>                       | 0.000 | 0.000 | 1.000   |
|                                 | <i>Brevibacterium</i>                     | 0.000 | 0.000 | 0.999   |
|                                 | <i>Candidatus_Kuenenia</i>                | 0.000 | 0.004 | 0.994   |
|                                 | <i>Filifactor</i>                         | 0.023 | 0.378 | 0.875   |

|                                  |       |       |         |
|----------------------------------|-------|-------|---------|
| <i>Finegoldia</i>                | 0.005 | 0.127 | 0.944   |
| <i>Lachnoanaerobaculum</i>       | 0.002 | 0.056 | 0.967   |
| <i>Lactobacillus</i>             | 0.018 | 0.318 | (0.890) |
| <i>norank_c_SJA-15</i>           | 0.003 | 0.093 | 0.955   |
| <i>norank_f_Anaerolineaceae</i>  | 0.006 | 0.160 | 0.935   |
| <i>norank_f_BIrii41</i>          | 0.000 | 0.002 | 0.996   |
| <i>norank_f_Holosporaceae</i>    | 0.029 | 0.440 | 0.859   |
| <i>norank_f_NS9_marine_group</i> | 0.000 | 0.000 | 1.000   |
| <i>norank_o_Acidimicrobiales</i> | 0.000 | 0.003 | 0.996   |
| <i>norank_o_Run-SP154</i>        | 0.000 | 0.000 | 1.000   |
| <i>norank_o_SC-I-84</i>          | 0.000 | 0.000 | 1.000   |
| <i>OM27_clade</i>                | 0.000 | 0.020 | 0.984   |
| <i>Paludibaculum</i>             | 0.030 | 0.448 | 0.856   |
| <i>Podosphaera</i>               | 0.005 | 0.142 | 0.939   |
| <i>Prevotella</i>                | 0.018 | 0.322 | 0.889   |
| <i>Propioniciclava</i>           | 0.000 | 0.000 | 1.000   |
| <i>Rothia</i>                    | 0.001 | 0.025 | 0.980   |
| <i>Sandaracinobacter</i>         | 0.000 | 0.004 | 0.994   |
| <i>Scardovia</i>                 | 0.000 | 0.000 | 1.000   |
| <i>Schwartzia</i>                | 0.000 | 0.000 | 1.000   |
| <i>Simiduia</i>                  | 0.000 | 0.000 | 1.000   |
| <i>Sphingobacterium</i>          | 0.000 | 0.000 | 1.000   |
| <i>Sulfuricurvum</i>             | 0.000 | 0.004 | 0.995   |
| <i>Sulfuritalea</i>              | 0.005 | 0.131 | 0.943   |
| <i>Thauera</i>                   | 0.046 | 0.539 | 0.819   |
| <i>Virgibacillus</i>             | 0.045 | 0.527 | 0.822   |

|                    |                                              |       |       |       |
|--------------------|----------------------------------------------|-------|-------|-------|
|                    | <i>Woodsholea</i>                            | 0.000 | 0.000 | 1.000 |
| 2-O-decyl-Threitol | <i>[Eubacterium]_coprostanoligenes_group</i> | 0.006 | 0.144 | 0.939 |
|                    | <i>Acinetobacter</i>                         | 0.019 | 0.337 | 0.885 |
|                    | <i>Alistipes</i>                             | 0.002 | 0.058 | 0.966 |
|                    | <i>Alloprevotella</i>                        | 0.009 | 0.203 | 0.922 |
|                    | <i>Anaerobiospirillum</i>                    | 0.001 | 0.025 | 0.980 |
|                    | <i>Anaerostipes</i>                          | 0.040 | 0.512 | 0.832 |
|                    | <i>Aspergillus</i>                           | 0.001 | 0.030 | 0.978 |
|                    | <i>Bacillus</i>                              | 0.000 | 0.025 | 0.982 |
|                    | <i>Blautia</i>                               | 0.002 | 0.073 | 0.961 |
|                    | <i>Brevundimonas</i>                         | 0.035 | 0.474 | 0.842 |
|                    | <i>Burkholderia-Paraburkholderia</i>         | 0.028 | 0.434 | 0.860 |
|                    | <i>Candidatus_Saccharimonas</i>              | 0.001 | 0.025 | 0.980 |
|                    | <i>Catenibacterium</i>                       | 0.010 | 0.212 | 0.919 |
|                    | <i>Christensenellaceae_R-7_group</i>         | 0.007 | 0.176 | 0.929 |
|                    | <i>Chroococciopsis</i>                       | 0.018 | 0.318 | 0.889 |
|                    | <i>Clostridium_sensu_stricto_15</i>          | 0.010 | 0.218 | 0.916 |
|                    | <i>Coprococcus_3</i>                         | 0.031 | 0.459 | 0.852 |
|                    | <i>Desulfovibrio</i>                         | 0.004 | 0.118 | 0.947 |
|                    | <i>Devosia</i>                               | 0.001 | 0.046 | 0.971 |
|                    | <i>Dialister</i>                             | 0.006 | 0.164 | 0.933 |
|                    | <i>Dokdonella</i>                            | 0.009 | 0.203 | 0.922 |
|                    | <i>Dyella</i>                                | 0.031 | 0.453 | 0.854 |
|                    | <i>Enorma</i>                                | 0.001 | 0.025 | 0.980 |
|                    | <i>Enterococcus</i>                          | 0.004 | 0.112 | 0.949 |
|                    | <i>Erysipelotrichaceae_UCG-002</i>           | 0.042 | 0.520 | 0.827 |



|                                           |       |       |         |
|-------------------------------------------|-------|-------|---------|
| <i>Faecalibacterium</i>                   | 0.004 | 0.118 | 0.947   |
| <i>Faecalibaculum</i>                     | 0.031 | 0.453 | 0.854   |
| <i>Family_XIII_AD3011_group</i>           | 0.021 | 0.359 | 0.879   |
| <i>Haliangium</i>                         | 0.001 | 0.025 | 0.980   |
| <i>Helicobacter</i>                       | 0.024 | 0.394 | 0.871   |
| <i>Holdemanella</i>                       | 0.013 | 0.264 | 0.904   |
| <i>Inquilinus</i>                         | 0.001 | 0.025 | 0.980   |
| <i>Kroppenstedtia</i>                     | 0.003 | 0.085 | 0.957   |
| <i>Lachnospiraceae_UCG-010</i>            | 0.001 | 0.025 | 0.980   |
| <i>Lactococcus</i>                        | 0.007 | 0.176 | (0.929) |
| <i>Lawsonella</i>                         | 0.000 | 0.016 | 0.986   |
| <i>Limnohabitans</i>                      | 0.001 | 0.025 | 0.980   |
| <i>Marinobacter</i>                       | 0.001 | 0.025 | 0.980   |
| <i>Marvinbryantia</i>                     | 0.008 | 0.191 | 0.925   |
| <i>Megasphaera</i>                        | 0.009 | 0.210 | 0.919   |
| <i>Mesorhizobium</i>                      | 0.031 | 0.461 | 0.852   |
| <i>Microtholunatus</i>                    | 0.008 | 0.190 | 0.925   |
| <i>Mycobacterium</i>                      | 0.002 | 0.070 | 0.962   |
| <i>Nakamurella</i>                        | 0.002 | 0.059 | 0.966   |
| <i>Nitrolancea</i>                        | 0.008 | 0.196 | 0.924   |
| <i>Nitrospira</i>                         | 0.016 | 0.300 | 0.894   |
| <i>norank_c_Acidobacteria</i>             | 0.005 | 0.131 | 0.943   |
| <i>norank_c_Bacteroidetes_BD2-2</i>       | 0.001 | 0.025 | 0.980   |
| <i>norank_c_Bacteroidetes_VC2.1_Bac22</i> | 0.001 | 0.025 | 0.980   |
| <i>norank_c_BD7-11</i>                    | 0.001 | 0.053 | 0.969   |
| <i>norank_c_Cyanobacteria</i>             | 0.047 | 0.540 | 0.818   |

|                                               |       |       |       |
|-----------------------------------------------|-------|-------|-------|
| <i>norank_f_Acidimicrobiaceae</i>             | 0.001 | 0.025 | 0.980 |
| <i>norank_f_Acidobacteriaceae_Subgroup_1</i>  | 0.001 | 0.025 | 0.980 |
| <i>norank_f_Actinopolysporaceae</i>           | 0.018 | 0.327 | 0.887 |
| <i>norank_f_B79</i>                           | 0.004 | 0.106 | 0.951 |
| <i>norank_f_Bacteroidales_BS11_gut_group</i>  | 0.012 | 0.237 | 0.911 |
| <i>norank_f_Bacteroidales_S24-7_group</i>     | 0.006 | 0.163 | 0.934 |
| <i>norank_f_Bacteroidales_UCG-001</i>         | 0.033 | 0.473 | 0.849 |
| <i>norank_f_Chitinophagaceae</i>              | 0.001 | 0.048 | 0.970 |
| <i>norank_f_Clostridiales_vadinBB60_group</i> | 0.001 | 0.025 | 0.980 |
| <i>norank_f_Gemmatimonadaceae</i>             | 0.001 | 0.025 | 0.980 |
| <i>norank_f_JTB255_marine_benthic_group</i>   | 0.001 | 0.025 | 0.980 |
| <i>norank_f_Lachnospiraceae</i>               | 0.014 | 0.272 | 0.902 |
| <i>norank_f_MNG7</i>                          | 0.028 | 0.434 | 0.860 |
| <i>norank_f_MSB-1E8</i>                       | 0.009 | 0.203 | 0.922 |
| <i>norank_f_Neisseriaceae</i>                 | 0.049 | 0.562 | 0.813 |
| <i>norank_f_Nitrosomonadaceae</i>             | 0.004 | 0.113 | 0.948 |
| <i>norank_f_Rhodospirillaceae</i>             | 0.000 | 0.018 | 0.985 |
| <i>norank_f_Xanthomonadaceae</i>              | 0.002 | 0.061 | 0.965 |
| <i>norank_f_XIII</i>                          | 0.001 | 0.025 | 0.980 |
| <i>norank_o_AKYG1722</i>                      | 0.001 | 0.025 | 0.980 |
| <i>norank_o_Gaiellales</i>                    | 0.016 | 0.294 | 0.896 |
| <i>norank_o_Limnochordales</i>                | 0.001 | 0.025 | 0.980 |
| <i>norank_o_Obscuribacterales</i>             | 0.001 | 0.039 | 0.974 |
| <i>norank_o_Subgroup_7</i>                    | 0.001 | 0.025 | 0.980 |
| <i>norank_o_TRA3-20</i>                       | 0.006 | 0.150 | 0.937 |
| <i>norank_o_Xanthomonadales</i>               | 0.006 | 0.147 | 0.938 |

|                                    |       |       |       |
|------------------------------------|-------|-------|-------|
| <i>norank_p_Parcubacteria</i>      | 0.016 | 0.300 | 0.894 |
| <i>norank_p_TM6_Dependentiae_</i>  | 0.001 | 0.025 | 0.980 |
| <i>Oceanobacillus</i>              | 0.020 | 0.344 | 0.882 |
| <i>Oribacterium</i>                | 0.024 | 0.394 | 0.871 |
| <i>Oscillibacter</i>               | 0.029 | 0.447 | 0.857 |
| <i>Paenibacillus</i>               | 0.039 | 0.504 | 0.835 |
| <i>Papillibacter</i>               | 0.001 | 0.025 | 0.980 |
| <i>Parabacteroides</i>             | 0.001 | 0.047 | 0.971 |
| <i>Paracoccus</i>                  | 0.025 | 0.404 | 0.868 |
| <i>Pelomonas</i>                   | 0.032 | 0.463 | 0.851 |
| <i>Perlucidibaca</i>               | 0.001 | 0.025 | 0.980 |
| <i>Phascolarctobacterium</i>       | 0.020 | 0.342 | 0.883 |
| <i>Prevotella_1</i>                | 0.012 | 0.237 | 0.911 |
| <i>Prevotella_7</i>                | 0.044 | 0.525 | 0.823 |
| <i>Prevotella_9</i>                | 0.039 | 0.510 | 0.833 |
| <i>Prevotellaceae_NK3B31_group</i> | 0.011 | 0.229 | 0.913 |
| <i>Prevotellaceae_UCG-001</i>      | 0.002 | 0.064 | 0.964 |
| <i>Prevotellaceae_UCG-003</i>      | 0.003 | 0.096 | 0.954 |
| <i>Pseudoclavibacter</i>           | 0.001 | 0.045 | 0.971 |
| <i>Pyramidobacter</i>              | 0.001 | 0.025 | 0.980 |
| <i>Ralstonia</i>                   | 0.001 | 0.034 | 0.976 |
| <i>Rikenellaceae_RC9_gut_group</i> | 0.004 | 0.120 | 0.946 |
| <i>Rubellimicrobium</i>            | 0.029 | 0.445 | 0.857 |
| <i>Ruminococcaceae_UCG-002</i>     | 0.044 | 0.520 | 0.824 |
| <i>Ruminococcaceae_UCG-007</i>     | 0.001 | 0.025 | 0.980 |
| <i>Ruminococcaceae_UCG-010</i>     | 0.001 | 0.025 | 0.980 |

|                                         |       |       |         |
|-----------------------------------------|-------|-------|---------|
| <i>Ruminococcaceae_UCG-011</i>          | 0.007 | 0.175 | 0.931   |
| <i>Ruminococcus_1</i>                   | 0.001 | 0.035 | 0.975   |
| <i>Ruminococcus_2</i>                   | 0.009 | 0.209 | 0.920   |
| <i>Saccharomyces</i>                    | 0.016 | 0.294 | (0.896) |
| <i>Saccharopolyspora</i>                | 0.003 | 0.082 | 0.958   |
| <i>Sedimentibacter</i>                  | 0.001 | 0.025 | 0.980   |
| <i>Selenomonas</i>                      | 0.002 | 0.073 | 0.961   |
| <i>Sphingomonas</i>                     | 0.035 | 0.474 | 0.842   |
| <i>Spirochaeta_2</i>                    | 0.030 | 0.450 | 0.856   |
| <i>Stenotrophomonas</i>                 | 0.010 | 0.218 | 0.916   |
| <i>Streptococcus</i>                    | 0.007 | 0.177 | 0.929   |
| <i>Streptomyces</i>                     | 0.009 | 0.207 | 0.921   |
| <i>Subdoligranulum</i>                  | 0.008 | 0.188 | 0.926   |
| <i>Succinivibrio</i>                    | 0.011 | 0.228 | 0.914   |
| <i>Thalassobacillus</i>                 | 0.001 | 0.025 | 0.980   |
| <i>Thermomonas</i>                      | 0.035 | 0.474 | 0.843   |
| <i>Tyzzerella_3</i>                     | 0.001 | 0.025 | 0.980   |
| <i>unclassified_f_Comamonadaceae</i>    | 0.041 | 0.518 | 0.830   |
| <i>unclassified_f_Coriobacteriaceae</i> | 0.001 | 0.025 | 0.980   |
| <i>unclassified_f_Lachnospiraceae</i>   | 0.041 | 0.518 | 0.830   |
| <i>unclassified_f_Microbacteriaceae</i> | 0.001 | 0.025 | 0.980   |
| <i>unclassified_f_Nocardoidaceae</i>    | 0.001 | 0.025 | 0.980   |
| <i>unclassified_f_Prevotellaceae</i>    | 0.006 | 0.148 | 0.938   |
| <i>unclassified_f_Xanthobacteraceae</i> | 0.034 | 0.474 | 0.846   |
| <i>unclassified_f_Xanthomonadaceae</i>  | 0.004 | 0.113 | 0.949   |
| <i>unclassified_o_Chlamydiales</i>      | 0.001 | 0.025 | 0.980   |

|                           |                                           |       |       |         |
|---------------------------|-------------------------------------------|-------|-------|---------|
| 2-phenoxy-Ethanol         | <i>unclassified_o_Solirubrobacterales</i> | 0.001 | 0.025 | 0.980   |
|                           | <i>Aspergillus</i>                        | 0.040 | 0.512 | 0.832   |
|                           | <i>Bifidobacterium</i>                    | 0.027 | 0.424 | 0.863   |
|                           | <i>Denitratisoma</i>                      | 0.017 | 0.306 | 0.893   |
|                           | <i>Erysipelotrichaceae_UCG-002</i>        | 0.023 | 0.378 | 0.875   |
|                           | <i>Lactococcus</i>                        | 0.045 | 0.526 | (0.822) |
|                           | <i>Lawsonella</i>                         | 0.044 | 0.523 | 0.823   |
|                           | <i>Lysinibacillus</i>                     | 0.036 | 0.481 | 0.840   |
|                           | <i>Marvinbryantia</i>                     | 0.024 | 0.396 | 0.870   |
|                           | <i>Mesorhizobium</i>                      | 0.030 | 0.453 | 0.855   |
|                           | <i>norank_f_MNG7</i>                      | 0.049 | 0.561 | 0.814   |
|                           | <i>norank_o_Obscuribacterales</i>         | 0.034 | 0.474 | 0.846   |
|                           | <i>norank_o_TRA3-20</i>                   | 0.003 | 0.095 | 0.954   |
|                           | <i>Parabacteroides</i>                    | 0.037 | 0.492 | 0.838   |
|                           | <i>Prevotella_7</i>                       | 0.011 | 0.228 | 0.913   |
|                           | <i>Rhizomicrobium</i>                     | 0.013 | 0.266 | 0.904   |
|                           | <i>Ruminiclostridium_9</i>                | 0.011 | 0.225 | 0.915   |
|                           | <i>Saccharomyces</i>                      | 0.015 | 0.283 | (0.899) |
|                           | <i>Spirochaeta_2</i>                      | 0.000 | 0.022 | 0.984   |
|                           | <i>Staphylococcus</i>                     | 0.010 | 0.218 | 0.916   |
| 3-(methylthio)-1-Propanol | <i>[Eubacterium]_nodatum_group</i>        | 0.000 | 0.000 | 1.000   |
|                           | <i>Anaerofilum</i>                        | 0.005 | 0.139 | 0.940   |
|                           | <i>Cellulosimicrobium</i>                 | 0.015 | 0.290 | (0.897) |
|                           | <i>Escherichia-Shigella</i>               | 0.041 | 0.520 | (0.829) |
|                           | <i>norank_c_Cyanobacteria</i>             | 0.044 | 0.523 | (0.823) |
|                           | <i>norank_f_PHOS-HE51</i>                 | 0.005 | 0.139 | 0.940   |

|                                           |                                              |       |       |         |
|-------------------------------------------|----------------------------------------------|-------|-------|---------|
| 3,7-dimethyl-1,6-Octadien-3-ol            | <i>norank_o_Mollicutes_RF9</i>               | 0.005 | 0.139 | 0.940   |
|                                           | [ <i>Eubacterium</i> ] <i>_nodatum_group</i> | 0.000 | 0.000 | 0.999   |
|                                           | <i>Anaerofilum</i>                           | 0.007 | 0.176 | 0.929   |
|                                           | <i>Cellulosimicrobium</i>                    | 0.013 | 0.266 | (0.904) |
|                                           | <i>Escherichia-Shigella</i>                  | 0.044 | 0.523 | (0.823) |
|                                           | <i>norank_c_Cyanobacteria</i>                | 0.041 | 0.518 | (0.831) |
|                                           | <i>norank_f_PHOS-HE51</i>                    | 0.007 | 0.176 | 0.929   |
| 3-methyl-1-Butanol                        | <i>norank_o_Mollicutes_RF9</i>               | 0.007 | 0.176 | 0.929   |
|                                           | [ <i>Eubacterium</i> ] <i>_eligens_group</i> | 0.007 | 0.178 | (0.928) |
|                                           | <i>Anaerotruncus</i>                         | 0.003 | 0.094 | (0.954) |
|                                           | <i>Cloacibacterium</i>                       | 0.043 | 0.520 | 0.826   |
|                                           | <i>Lachnospiraceae_NK4A136_group</i>         | 0.027 | 0.423 | (0.864) |
|                                           | <i>norank_f_Erysipelotrichaceae</i>          | 0.025 | 0.404 | (0.868) |
|                                           | <i>Odoribacter</i>                           | 0.031 | 0.456 | (0.853) |
| 4-methyl-1-Heptanol                       | [ <i>Eubacterium</i> ] <i>_nodatum_group</i> | 0.005 | 0.128 | 0.944   |
|                                           | <i>Anaerofilum</i>                           | 0.000 | 0.000 | 1.000   |
|                                           | <i>Escherichia-Shigella</i>                  | 0.036 | 0.478 | (0.841) |
|                                           | <i>norank_f_PHOS-HE51</i>                    | 0.000 | 0.000 | 1.000   |
|                                           | <i>norank_o_Mollicutes_RF9</i>               | 0.000 | 0.000 | 1.000   |
| 5-methyl-2-(1-methylethenyl)-4-Hexen-1-ol | [ <i>Eubacterium</i> ] <i>_nodatum_group</i> | 0.005 | 0.128 | 0.944   |
|                                           | <i>Anaerofilum</i>                           | 0.000 | 0.000 | 1.000   |
|                                           | <i>Escherichia-Shigella</i>                  | 0.036 | 0.478 | (0.841) |
|                                           | <i>norank_f_PHOS-HE51</i>                    | 0.000 | 0.000 | 1.000   |
|                                           | <i>norank_o_Mollicutes_RF9</i>               | 0.000 | 0.000 | 1.000   |
| 6-Methyl-1-octanol                        | [ <i>Eubacterium</i> ] <i>_hallii_group</i>  | 0.000 | 0.000 | 1.000   |
|                                           | <i>Abiotrophia</i>                           | 0.003 | 0.091 | 0.955   |

|                        |                                     |       |       |         |
|------------------------|-------------------------------------|-------|-------|---------|
|                        | <i>Acidisoma</i>                    | 0.001 | 0.053 | 0.968   |
|                        | <i>Aggregatibacter</i>              | 0.002 | 0.058 | 0.966   |
|                        | <i>Capnocytophaga</i>               | 0.000 | 0.005 | 0.993   |
|                        | <i>Caulobacter</i>                  | 0.007 | 0.176 | 0.930   |
|                        | <i>Cetobacterium</i>                | 0.011 | 0.229 | 0.913   |
|                        | <i>Eikenella</i>                    | 0.000 | 0.001 | 0.997   |
|                        | <i>Gemella</i>                      | 0.016 | 0.294 | 0.896   |
|                        | <i>Geobacillus</i>                  | 0.002 | 0.058 | 0.966   |
|                        | <i>Hydrogenophilus</i>              | 0.000 | 0.013 | 0.988   |
|                        | <i>Ignatzschineria</i>              | 0.000 | 0.000 | 1.000   |
|                        | <i>Microbacterium</i>               | 0.032 | 0.472 | (0.849) |
|                        | <i>Moraxella</i>                    | 0.038 | 0.495 | 0.837   |
|                        | <i>Neisseria</i>                    | 0.002 | 0.075 | 0.960   |
|                        | <i>norank_f_I-10</i>                | 0.015 | 0.290 | 0.897   |
|                        | <i>Porphyromonas</i>                | 0.002 | 0.069 | 0.962   |
|                        | <i>Pseudolabrys</i>                 | 0.001 | 0.053 | 0.968   |
|                        | <i>Pseudonocardia</i>               | 0.000 | 0.000 | 1.000   |
|                        | <i>Solirubrobacter</i>              | 0.030 | 0.453 | 0.854   |
|                        | <i>Sorangium</i>                    | 0.007 | 0.167 | 0.933   |
|                        | <i>unclassified_f_Rikenellaceae</i> | 0.014 | 0.266 | 0.904   |
|                        | <i>unclassified_o_Rhizobiales</i>   | 0.029 | 0.448 | 0.856   |
|                        | <i>Undibacterium</i>                | 0.003 | 0.080 | 0.959   |
|                        | <i>Veillonella</i>                  | 0.027 | 0.431 | 0.861   |
|                        | <i>Vibrionimonas</i>                | 0.023 | 0.386 | 0.873   |
| 9,12-Octadecadien-1-ol | <i>[Eubacterium]_nodatum_group</i>  | 0.000 | 0.001 | 0.998   |
|                        | <i>Anaerofilum</i>                  | 0.009 | 0.203 | 0.922   |

|                     |                                              |       |       |         |
|---------------------|----------------------------------------------|-------|-------|---------|
|                     | <i>Cellulosimicrobium</i>                    | 0.013 | 0.251 | (0.907) |
|                     | <i>Enhydrobacter</i>                         | 0.048 | 0.558 | (0.814) |
|                     | <i>Escherichia-Shigella</i>                  | 0.046 | 0.539 | (0.819) |
|                     | <i>norank_c_Cyanobacteria</i>                | 0.039 | 0.504 | (0.835) |
|                     | <i>norank_f_PHOS-HE51</i>                    | 0.009 | 0.203 | 0.922   |
|                     | <i>norank_o_Mollicutes_RF9</i>               | 0.009 | 0.203 | 0.922   |
| Octaethylene glycol | <i>[Eubacterium]_coprostanoligenes_group</i> | 0.001 | 0.047 | 0.971   |
|                     | <i>Acinetobacter</i>                         | 0.018 | 0.318 | 0.890   |
|                     | <i>Alistipes</i>                             | 0.000 | 0.001 | 0.998   |
|                     | <i>Alloprevotella</i>                        | 0.000 | 0.017 | 0.986   |
|                     | <i>Anaerobiospirillum</i>                    | 0.000 | 0.004 | 0.994   |
|                     | <i>Anaerostipes</i>                          | 0.007 | 0.176 | 0.929   |
|                     | <i>Aspergillus</i>                           | 0.000 | 0.013 | 0.988   |
|                     | <i>Bacillus</i>                              | 0.005 | 0.128 | 0.944   |
|                     | <i>Blautia</i>                               | 0.015 | 0.288 | 0.898   |
|                     | <i>Burkholderia-Paraburkholderia</i>         | 0.039 | 0.504 | 0.835   |
|                     | <i>Candidatus_Saccharimonas</i>              | 0.000 | 0.004 | 0.994   |
|                     | <i>Catenibacterium</i>                       | 0.000 | 0.006 | 0.992   |
|                     | <i>Christensenellaceae_R-7_group</i>         | 0.010 | 0.222 | 0.915   |
|                     | <i>Chroococciopsis</i>                       | 0.021 | 0.354 | 0.880   |
|                     | <i>Clostridium_sensu_stricto_15</i>          | 0.000 | 0.015 | 0.987   |
|                     | <i>Coprococcus_3</i>                         | 0.002 | 0.065 | 0.964   |
|                     | <i>Desulfovibrio</i>                         | 0.000 | 0.001 | 0.997   |
|                     | <i>Devosia</i>                               | 0.000 | 0.004 | 0.995   |
|                     | <i>Dialister</i>                             | 0.002 | 0.072 | 0.961   |
|                     | <i>Dokdonella</i>                            | 0.034 | 0.474 | 0.846   |



|                                           |       |       |       |
|-------------------------------------------|-------|-------|-------|
| <i>Dyella</i>                             | 0.020 | 0.344 | 0.883 |
| <i>Enorma</i>                             | 0.000 | 0.004 | 0.994 |
| <i>Enterococcus</i>                       | 0.000 | 0.007 | 0.992 |
| <i>Erysipelotrichaceae_UCG-002</i>        | 0.024 | 0.392 | 0.871 |
| <i>Faecalibacterium</i>                   | 0.000 | 0.009 | 0.990 |
| <i>Faecalibaculum</i>                     | 0.041 | 0.518 | 0.830 |
| <i>Family_XIII_AD3011_group</i>           | 0.002 | 0.072 | 0.961 |
| <i>Haliangium</i>                         | 0.000 | 0.004 | 0.994 |
| <i>Helicobacter</i>                       | 0.001 | 0.040 | 0.973 |
| <i>Holdemanella</i>                       | 0.001 | 0.044 | 0.972 |
| <i>Inquilinus</i>                         | 0.000 | 0.004 | 0.994 |
| <i>Kroppenstedtia</i>                     | 0.012 | 0.249 | 0.908 |
| <i>Lachnospiraceae_UCG-010</i>            | 0.000 | 0.004 | 0.994 |
| <i>Lawsonella</i>                         | 0.003 | 0.102 | 0.952 |
| <i>Limnohabitans</i>                      | 0.000 | 0.004 | 0.994 |
| <i>Marinobacter</i>                       | 0.000 | 0.004 | 0.994 |
| <i>Marvinbryantia</i>                     | 0.022 | 0.373 | 0.876 |
| <i>Megasphaera</i>                        | 0.019 | 0.337 | 0.885 |
| <i>Microtholus</i>                        | 0.016 | 0.293 | 0.896 |
| <i>Mycobacterium</i>                      | 0.020 | 0.344 | 0.882 |
| <i>Nakamurella</i>                        | 0.002 | 0.070 | 0.962 |
| <i>Nitrolancea</i>                        | 0.001 | 0.039 | 0.974 |
| <i>Nitrospira</i>                         | 0.017 | 0.308 | 0.892 |
| <i>norank_c_Acidobacteria</i>             | 0.004 | 0.119 | 0.947 |
| <i>norank_c_Bacteroidetes_BD2-2</i>       | 0.000 | 0.004 | 0.994 |
| <i>norank_c_Bacteroidetes_VC2.1_Bac22</i> | 0.000 | 0.004 | 0.994 |

|                                               |       |       |       |
|-----------------------------------------------|-------|-------|-------|
| <i>norank_c_BD7-11</i>                        | 0.001 | 0.044 | 0.972 |
| <i>norank_f_Acidimicrobiaceae</i>             | 0.000 | 0.004 | 0.994 |
| <i>norank_f_Acidobacteriaceae_Subgroup_1</i>  | 0.000 | 0.004 | 0.994 |
| <i>norank_f_Actinopolysporaceae</i>           | 0.034 | 0.474 | 0.844 |
| <i>norank_f_B79</i>                           | 0.005 | 0.140 | 0.940 |
| <i>norank_f_Bacteroidales_BS11_gut_group</i>  | 0.009 | 0.207 | 0.921 |
| <i>norank_f_Bacteroidales_S24-7_group</i>     | 0.002 | 0.056 | 0.967 |
| <i>norank_f_Bacteroidales_UCG-001</i>         | 0.030 | 0.452 | 0.855 |
| <i>norank_f_Chitinophagaceae</i>              | 0.000 | 0.012 | 0.989 |
| <i>norank_f_Clostridiales_vadinBB60_group</i> | 0.000 | 0.004 | 0.994 |
| <i>norank_f_Gemmatimonadaceae</i>             | 0.000 | 0.004 | 0.994 |
| <i>norank_f_JTB255_marine_benthic_group</i>   | 0.000 | 0.004 | 0.994 |
| <i>norank_f_Lachnospiraceae</i>               | 0.021 | 0.356 | 0.880 |
| <i>norank_f_MNG7</i>                          | 0.027 | 0.431 | 0.862 |
| <i>norank_f_Nitrosomonadaceae</i>             | 0.000 | 0.025 | 0.982 |
| <i>norank_f_Rhodospirillaceae</i>             | 0.002 | 0.058 | 0.966 |
| <i>norank_f_Xanthomonadaceae</i>              | 0.000 | 0.007 | 0.991 |
| <i>norank_f_XIII</i>                          | 0.000 | 0.004 | 0.994 |
| <i>norank_o_AKYG1722</i>                      | 0.000 | 0.004 | 0.994 |
| <i>norank_o_Gaiellales</i>                    | 0.035 | 0.474 | 0.842 |
| <i>norank_o_Limnochordales</i>                | 0.000 | 0.004 | 0.994 |
| <i>norank_o_Obscuribacterales</i>             | 0.001 | 0.025 | 0.980 |
| <i>norank_o_Subgroup_7</i>                    | 0.000 | 0.004 | 0.994 |
| <i>norank_o_TRA3-20</i>                       | 0.015 | 0.282 | 0.899 |
| <i>norank_o_Xanthomonadales</i>               | 0.000 | 0.025 | 0.982 |
| <i>norank_p_Parcubacteria</i>                 | 0.019 | 0.332 | 0.886 |

|                                    |       |       |       |
|------------------------------------|-------|-------|-------|
| <i>norank_p_TM6_Dependentiae_</i>  | 0.000 | 0.004 | 0.994 |
| <i>Oceanobacillus</i>              | 0.012 | 0.246 | 0.909 |
| <i>Odoribacter</i>                 | 0.006 | 0.164 | 0.934 |
| <i>Oribacterium</i>                | 0.001 | 0.040 | 0.973 |
| <i>Oscillibacter</i>               | 0.005 | 0.128 | 0.944 |
| <i>Paenibacillus</i>               | 0.040 | 0.512 | 0.832 |
| <i>Papillibacter</i>               | 0.000 | 0.004 | 0.994 |
| <i>Parabacteroides</i>             | 0.000 | 0.011 | 0.989 |
| <i>Pelomonas</i>                   | 0.034 | 0.474 | 0.845 |
| <i>Perlucidibaca</i>               | 0.000 | 0.004 | 0.994 |
| <i>Phascolarctobacterium</i>       | 0.022 | 0.372 | 0.876 |
| <i>Prevotella_1</i>                | 0.000 | 0.015 | 0.987 |
| <i>Prevotella_9</i>                | 0.004 | 0.113 | 0.949 |
| <i>Prevotellaceae_NK3B31_group</i> | 0.000 | 0.025 | 0.982 |
| <i>Prevotellaceae_UCG-001</i>      | 0.001 | 0.034 | 0.976 |
| <i>Prevotellaceae_UCG-003</i>      | 0.000 | 0.000 | 1.000 |
| <i>Pseudoclavibacter</i>           | 0.008 | 0.178 | 0.928 |
| <i>Pyramidobacter</i>              | 0.000 | 0.004 | 0.994 |
| <i>Ralstonia</i>                   | 0.007 | 0.169 | 0.932 |
| <i>Rikenellaceae_RC9_gut_group</i> | 0.002 | 0.059 | 0.966 |
| <i>Rubellimicrobium</i>            | 0.032 | 0.472 | 0.849 |
| <i>Ruminiclostridium</i>           | 0.046 | 0.538 | 0.819 |
| <i>Ruminococcaceae_UCG-002</i>     | 0.005 | 0.131 | 0.942 |
| <i>Ruminococcaceae_UCG-007</i>     | 0.000 | 0.004 | 0.994 |
| <i>Ruminococcaceae_UCG-010</i>     | 0.000 | 0.004 | 0.994 |
| <i>Ruminococcaceae_UCG-011</i>     | 0.011 | 0.226 | 0.914 |

|                     |                                           |       |       |         |
|---------------------|-------------------------------------------|-------|-------|---------|
|                     | <i>Ruminococcus_1</i>                     | 0.000 | 0.005 | 0.993   |
|                     | <i>Ruminococcus_2</i>                     | 0.003 | 0.086 | 0.957   |
|                     | <i>Saccharomyces</i>                      | 0.014 | 0.273 | (0.902) |
|                     | <i>Saccharopolyspora</i>                  | 0.004 | 0.118 | 0.947   |
|                     | <i>Sedimentibacter</i>                    | 0.000 | 0.004 | 0.994   |
|                     | <i>Selenomonas</i>                        | 0.000 | 0.003 | 0.996   |
|                     | <i>Stenotrophomonas</i>                   | 0.018 | 0.318 | 0.890   |
|                     | <i>Streptococcus</i>                      | 0.027 | 0.424 | 0.863   |
|                     | <i>Streptomyces</i>                       | 0.043 | 0.520 | 0.826   |
|                     | <i>Subdoligranulum</i>                    | 0.000 | 0.005 | 0.993   |
|                     | <i>Succinivibrio</i>                      | 0.000 | 0.006 | 0.993   |
|                     | <i>Thalassobacillus</i>                   | 0.000 | 0.004 | 0.994   |
|                     | <i>Thermomonas</i>                        | 0.046 | 0.540 | 0.818   |
|                     | <i>Treponema_2</i>                        | 0.017 | 0.310 | 0.892   |
|                     | <i>Tyzzarella_3</i>                       | 0.000 | 0.004 | 0.994   |
|                     | <i>unclassified_f_Comamonadaceae</i>      | 0.027 | 0.423 | 0.864   |
|                     | <i>unclassified_f_Coriobacteriaceae</i>   | 0.000 | 0.004 | 0.994   |
|                     | <i>unclassified_f_Microbacteriaceae</i>   | 0.000 | 0.004 | 0.994   |
|                     | <i>unclassified_f_Nocardoidaceae</i>      | 0.000 | 0.004 | 0.994   |
|                     | <i>unclassified_f_Prevotellaceae</i>      | 0.000 | 0.001 | 0.998   |
|                     | <i>unclassified_f_Xanthobacteraceae</i>   | 0.037 | 0.490 | 0.838   |
|                     | <i>unclassified_f_Xanthomonadaceae</i>    | 0.000 | 0.004 | 0.994   |
|                     | <i>unclassified_o_Chlamydiales</i>        | 0.000 | 0.004 | 0.994   |
|                     | <i>unclassified_o_Solirubrobacterales</i> | 0.000 | 0.004 | 0.994   |
| Phenylethyl Alcohol | <i>Bifidobacterium</i>                    | 0.039 | 0.510 | 0.833   |
|                     | <i>Bradyrhizobium</i>                     | 0.014 | 0.271 | 0.902   |

|                               |       |       |         |
|-------------------------------|-------|-------|---------|
| <i>Denitratisoma</i>          | 0.012 | 0.249 | 0.908   |
| <i>Enhydrobacter</i>          | 0.017 | 0.314 | 0.891   |
| <i>Lysinibacillus</i>         | 0.028 | 0.434 | 0.860   |
| <i>norank_c_Cyanobacteria</i> | 0.027 | 0.423 | 0.864   |
| <i>norank_f_0319-6G20</i>     | 0.047 | 0.543 | 0.818   |
| <i>norank_f_mle1-27</i>       | 0.028 | 0.431 | 0.861   |
| <i>norank_p_SBR1093</i>       | 0.021 | 0.359 | (0.879) |
| <i>Spirochaeta_2</i>          | 0.047 | 0.547 | 0.817   |
| <i>Thauera</i>                | 0.034 | 0.474 | 0.846   |
| <i>Thermoascus</i>            | 0.012 | 0.243 | 0.910   |

---

**Table S5.** Significant microbiota for HA-producing.

| Microbiota                        | quantiles | quantiles | significance    | significance    |
|-----------------------------------|-----------|-----------|-----------------|-----------------|
| <i>Lactobacillus</i>              | 0.1298    | -0.0145   | upper quantiles | No significance |
| <i>Weissella</i>                  | 0.1105    | 0.0269    | upper quantiles | No significance |
| <i>norank_p__SBR1093</i>          | 0.1113    | 0.0416    | upper quantiles | No significance |
| <i>Thermoascus</i>                | -0.1293   | -0.0175   | lower quantiles | No significance |
| <i>Podosphaera</i>                | -0.1318   | 0.0214    | lower quantiles | No significance |
| <i>Paludibaculum</i>              | -0.1179   | -0.0189   | lower quantiles | No significance |
| <i>norank_o__Acidimicrobiales</i> | -0.1248   | 0.0192    | lower quantiles | No significance |
| <i>Bifidobacterium</i>            | -0.1306   | -0.0019   | lower quantiles | No significance |
| <i>Scardovia</i>                  | -0.1234   | 0.0161    | lower quantiles | No significance |
| <i>Acidothermus</i>               | -0.1234   | 0.0161    | lower quantiles | No significance |
| <i>Brevibacterium</i>             | -0.1217   | 0.0222    | lower quantiles | No significance |
| <i>Rothia</i>                     | -0.1212   | -0.0018   | lower quantiles | No significance |
| <i>Propioniciclava</i>            | -0.1234   | 0.0161    | lower quantiles | No significance |
| <i>norank_f__NS9_marine_group</i> | -0.1234   | 0.0161    | lower quantiles | No significance |
| <i>Sphingobacterium</i>           | -0.1234   | 0.0161    | lower quantiles | No significance |
| <i>norank_f__Anaerolineaceae</i>  | -0.1326   | 0.0182    | lower quantiles | No significance |
| <i>norank_c__SJA-15</i>           | -0.1315   | 0.0208    | lower quantiles | No significance |
| <i>Staphylococcus</i>             | -0.1175   | 0.0454    | lower quantiles | No significance |
| <i>Anaerococcus</i>               | -0.1197   | 0.014     | lower quantiles | No significance |
| <i>Finegoldia</i>                 | -0.1133   | 0.0479    | lower quantiles | No significance |
| <i>Lachnoanaerobaculum</i>        | -0.1093   | 0.0412    | lower quantiles | No significance |
| <i>Filifactor</i>                 | -0.1348   | -0.0091   | lower quantiles | No significance |
| <i>Schwartzia</i>                 | -0.1234   | 0.0161    | lower quantiles | No significance |
| <i>Candidatus_Kuenenia</i>        | -0.1272   | 0.0178    | lower quantiles | No significance |

|                                    |         |         |                 |                 |
|------------------------------------|---------|---------|-----------------|-----------------|
| <i>Woodsholea</i>                  | -0.1234 | 0.0161  | lower quantiles | No significance |
| <i>norank_f__Holosporaceae</i>     | -0.1287 | 0.031   | lower quantiles | No significance |
| <i>Sandaracinobacter</i>           | -0.1271 | 0.0177  | lower quantiles | No significance |
| <i>Denitratisoma</i>               | -0.1089 | -0.0161 | lower quantiles | No significance |
| <i>Sulfuritalea</i>                | -0.1297 | -0.0076 | lower quantiles | No significance |
| <i>Thauera</i>                     | -0.1334 | 0.0328  | lower quantiles | No significance |
| <i>norank_o__SC-I-84</i>           | -0.1234 | 0.0161  | lower quantiles | No significance |
| <i>Bdellovibrio</i>                | -0.1234 | 0.0161  | lower quantiles | No significance |
| <i>OM27_clade</i>                  | -0.124  | 0.0123  | lower quantiles | No significance |
| <i>norank_f__BIrii41</i>           | -0.1264 | 0.0174  | lower quantiles | No significance |
| <i>Sulfuricurvum</i>               | -0.1202 | 0.0118  | lower quantiles | No significance |
| <i>Simiduia</i>                    | -0.1234 | 0.0161  | lower quantiles | No significance |
| <i>Enhydrobacter</i>               | -0.1061 | 0.065   | lower quantiles | No significance |
| <i>norank_o__Run-SP154</i>         | -0.1234 | 0.0161  | lower quantiles | No significance |
| <i>norank_p__Saccharibacteria</i>  | -0.1174 | -0.0211 | lower quantiles | No significance |
| <i>Pseudonocardia</i>              | 0.0531  | 0.1107  | No significance | upper quantiles |
| <i>Solirubrobacter</i>             | 0.0459  | 0.1135  | No significance | upper quantiles |
| <i>Porphyromonas</i>               | 0.0639  | 0.1087  | No significance | upper quantiles |
| <i>Capnocytophaga</i>              | 0.0519  | 0.1131  | No significance | upper quantiles |
| <i>norank_f__Simkaniaceae</i>      | -0.0678 | 0.1058  | No significance | upper quantiles |
| <i>Gemella</i>                     | 0.0138  | 0.1181  | No significance | upper quantiles |
| <i>[Eubacterium]_hallii_group</i>  | 0.0531  | 0.1107  | No significance | upper quantiles |
| <i>Veillonella</i>                 | -0.0116 | 0.109   | No significance | upper quantiles |
| <i>Ochrobactrum</i>                | 0.0382  | 0.1078  | No significance | upper quantiles |
| <i>Methylobacterium</i>            | -0.0454 | 0.12    | No significance | upper quantiles |
| <i>unclassified_o__Rhizobiales</i> | 0.045   | 0.1115  | No significance | upper quantiles |

|                        |         |        |                 |                 |
|------------------------|---------|--------|-----------------|-----------------|
| <i>Achromobacter</i>   | -0.0444 | 0.1082 | No significance | upper quantiles |
| <i>Aquabacterium</i>   | -0.0168 | 0.1068 | No significance | upper quantiles |
| <i>Undibacterium</i>   | 0.048   | 0.1169 | No significance | upper quantiles |
| <i>Eikenella</i>       | 0.0572  | 0.1094 | No significance | upper quantiles |
| <i>Neisseria</i>       | 0.0276  | 0.1092 | No significance | upper quantiles |
| <i>Aggregatibacter</i> | 0.0347  | 0.1144 | No significance | upper quantiles |
| <i>Haemophilus</i>     | -0.0604 | 0.1125 | No significance | upper quantiles |
| <i>Moraxella</i>       | 0.0129  | 0.1244 | No significance | upper quantiles |
| <i>Ignatzschineria</i> | 0.0531  | 0.1107 | No significance | upper quantiles |

---



**Table S6.** Correlation between HA and significant microbiota on genus level.

| Microbiota                        | HA                  | P value  | P adjust | correlation |
|-----------------------------------|---------------------|----------|----------|-------------|
| <i>Pseudonocardia</i>             | 6-Methyl-1-octanol  | 0        | 0        | 1           |
| <i>[Eubacterium]_hallii_group</i> | 6-Methyl-1-octanol  | 0        | 0        | 1           |
| <i>Ignatzschineria</i>            | 6-Methyl-1-octanol  | 0        | 0        | 1           |
| <i>norank_f__NS9_marine_group</i> | 2-methyl-1-Propanol | 2.26E-07 | 2.19E-05 | 0.999612    |
| <i>Woodsholea</i>                 | 2-methyl-1-Propanol | 2.26E-07 | 2.19E-05 | 0.999612    |
| <i>Scardovia</i>                  | 2-methyl-1-Propanol | 2.26E-07 | 2.19E-05 | 0.999612    |
| <i>Schwartzia</i>                 | 2-methyl-1-Propanol | 2.26E-07 | 2.19E-05 | 0.999612    |
| <i>norank_o__SC-I-84</i>          | 2-methyl-1-Propanol | 2.26E-07 | 2.19E-05 | 0.999612    |
| <i>Bdellovibrio</i>               | 2-methyl-1-Propanol | 2.26E-07 | 2.19E-05 | 0.999612    |
| <i>Simiduia</i>                   | 2-methyl-1-Propanol | 2.26E-07 | 2.19E-05 | 0.999612    |
| <i>Acidothermus</i>               | 2-methyl-1-Propanol | 2.26E-07 | 2.19E-05 | 0.999612    |
| <i>Propioniciclava</i>            | 2-methyl-1-Propanol | 2.26E-07 | 2.19E-05 | 0.999612    |
| <i>Sphingobacterium</i>           | 2-methyl-1-Propanol | 2.26E-07 | 2.19E-05 | 0.999612    |
| <i>norank_o__Run-SP154</i>        | 2-methyl-1-Propanol | 2.26E-07 | 2.19E-05 | 0.999612    |
| <i>Brevibacterium</i>             | 2-methyl-1-Propanol | 2.70E-06 | 0.000244 | 0.998658    |
| <i>Eikenella</i>                  | 6-Methyl-1-octanol  | 1.27E-05 | 0.001081 | 0.997083    |
| <i>norank_f__BIrii41</i>          | 2-methyl-1-Propanol | 2.17E-05 | 0.001734 | 0.996192    |
| <i>norank_o__Acidimicrobiales</i> | 2-methyl-1-Propanol | 2.59E-05 | 0.001954 | 0.995841    |
| <i>Sulfuricurvum</i>              | 2-methyl-1-Propanol | 4.37E-05 | 0.003122 | 0.994596    |
| <i>Sandaracinobacter</i>          | 2-methyl-1-Propanol | 4.76E-05 | 0.003229 | 0.994362    |
| <i>Candidatus_Kuenenia</i>        | 2-methyl-1-Propanol | 5.57E-05 | 0.003596 | 0.993903    |
| <i>Capnocytophaga</i>             | 6-Methyl-1-octanol  | 7.74E-05 | 0.004776 | 0.992807    |
| <i>OM27_clade</i>                 | 2-methyl-1-Propanol | 0.000361 | 0.020736 | 0.984437    |
| <i>Anaerococcus</i>               | 2-methyl-1-Propanol | 0.000367 | 0.020736 | 0.984323    |

|                                   |                            |          |          |          |
|-----------------------------------|----------------------------|----------|----------|----------|
| <i>Rothia</i>                     | 2-methyl-1-Propanol        | 0.000611 | 0.033159 | 0.979751 |
| <i>Lachnoanaerobaculum</i>        | 2-methyl-1-Propanol        | 0.001597 | 0.083338 | 0.967193 |
| <i>Aggregatibacter</i>            | 6-Methyl-1-octanol         | 0.001692 | 0.085053 | 0.966221 |
| <i>Neisseria</i>                  | 1-Hexacosanol              | 0.00207  | 0.098606 | 0.962621 |
| <i>Porphyromonas</i>              | 6-Methyl-1-octanol         | 0.002107 | 0.098606 | 0.962281 |
| <i>Neisseria</i>                  | 6-Methyl-1-octanol         | 0.002371 | 0.107258 | 0.959973 |
| <i>Undibacterium</i>              | 6-Methyl-1-octanol         | 0.002531 | 0.110784 | 0.958638 |
| <i>norank_c__SJA-15</i>           | 2-methyl-1-Propanol        | 0.003044 | 0.129075 | 0.954609 |
| <i>Ignatzschineria</i>            | 1-Hexacosanol              | 0.003918 | 0.151908 | 0.948447 |
| <i>[Eubacterium]_hallii_group</i> | 1-Hexacosanol              | 0.003918 | 0.151908 | 0.948447 |
| <i>Pseudonocardia</i>             | 1-Hexacosanol              | 0.003918 | 0.151908 | 0.948447 |
| <i>Finegoldia</i>                 | 2-methyl-1-Propanol        | 0.004563 | 0.164346 | 0.944326 |
| <i>Sulfuritalea</i>               | 2-methyl-1-Propanol        | 0.004809 | 0.164346 | 0.942831 |
| <i>Ignatzschineria</i>            | 1-Triacontanol             | 0.004889 | 0.164346 | 0.942351 |
| <i>Pseudonocardia</i>             | 1-Triacontanol             | 0.004889 | 0.164346 | 0.942351 |
| <i>[Eubacterium]_hallii_group</i> | 1-Triacontanol             | 0.004889 | 0.164346 | 0.942351 |
| <i>Neisseria</i>                  | 1-Triacontanol             | 0.004966 | 0.164346 | 0.941899 |
| <i>Podospaera</i>                 | 2-methyl-1-Propanol        | 0.00542  | 0.175127 | 0.939269 |
| <i>Veillonella</i>                | 1-Hexacosanol              | 0.005798 | 0.182975 | 0.937166 |
| <i>Eikenella</i>                  | 1-Hexacosanol              | 0.006064 | 0.18703  | 0.935724 |
| <i>norank_f__Anaerolineaceae</i>  | 2-methyl-1-Propanol        | 0.006285 | 0.189521 | 0.934553 |
| <i>Eikenella</i>                  | 1-Triacontanol             | 0.00699  | 0.206191 | 0.930939 |
| <i>Capnocytophaga</i>             | 1-Hexacosanol              | 0.008917 | 0.257452 | 0.921875 |
| <i>Enhydrobacter</i>              | 2-ethyl-1-Hexanol          | 0.009314 | 0.260578 | -0.92013 |
| <i>norank_p__Saccharibacteria</i> | 2-(2-butoxyethoxy)-Ethanol | 0.009409 | 0.260578 | 0.919717 |
| <i>Veillonella</i>                | 1-Triacontanol             | 0.009986 | 0.271025 | 0.917258 |

|                                    |                            |          |          |          |
|------------------------------------|----------------------------|----------|----------|----------|
| <i>Staphylococcus</i>              | 2-phenoxy-Ethanol          | 0.010218 | 0.271883 | 0.916288 |
| <i>Capnocytophaga</i>              | 1-Triacontanol             | 0.010806 | 0.281993 | 0.913879 |
| <i>Thermoascus</i>                 | Phenylethyl Alcohol        | 0.011879 | 0.304154 | 0.909637 |
| <i>Denitratisoma</i>               | Phenylethyl Alcohol        | 0.012361 | 0.306436 | 0.907794 |
| <i>Aggregatibacter</i>             | 1-Hexacosanol              | 0.01242  | 0.306436 | 0.90757  |
| <i>Enhydrobacter</i>               | 1-Heptadecanol             | 0.013067 | 0.316637 | -0.90515 |
| <i>Gemella</i>                     | 6-Methyl-1-octanol         | 0.015769 | 0.375401 | 0.895639 |
| <i>Denitratisoma</i>               | 2-phenoxy-Ethanol          | 0.016624 | 0.388947 | 0.892792 |
| <i>Enhydrobacter</i>               | Phenylethyl Alcohol        | 0.017204 | 0.395695 | 0.890903 |
| <i>Lactobacillus</i>               | 2-methyl-1-Propanol        | 0.01755  | 0.39692  | -0.88979 |
| <i>Finegoldia</i>                  | 2-(2-butoxyethoxy)-Ethanol | 0.019228 | 0.427747 | 0.884536 |
| <i>norank_p__SBR1093</i>           | Phenylethyl Alcohol        | 0.021135 | 0.462582 | -0.87883 |
| <i>Filifactor</i>                  | 2-methyl-1-Propanol        | 0.022541 | 0.480649 | 0.874773 |
| <i>Aggregatibacter</i>             | 1-Triacontanol             | 0.022669 | 0.480649 | 0.87441  |
| <i>Gemella</i>                     | 1-Triacontanol             | 0.023329 | 0.487034 | 0.872554 |
| <i>Gemella</i>                     | 1-Hexacosanol              | 0.023927 | 0.491962 | 0.870892 |
| <i>Undibacterium</i>               | 1-Triacontanol             | 0.024375 | 0.493686 | 0.869662 |
| <i>Undibacterium</i>               | 1-Hexacosanol              | 0.025587 | 0.510608 | 0.866385 |
| <i>Bifidobacterium</i>             | 2-phenoxy-Ethanol          | 0.026804 | 0.527139 | 0.863168 |
| <i>Veillonella</i>                 | 6-Methyl-1-octanol         | 0.027489 | 0.532901 | 0.861385 |
| <i>norank_f__Holosporaceae</i>     | 2-methyl-1-Propanol        | 0.028542 | 0.54137  | 0.85869  |
| <i>Anaerococcus</i>                | 2-(2-butoxyethoxy)-Ethanol | 0.028929 | 0.54137  | 0.85771  |
| <i>unclassified_o__Rhizobiales</i> | 6-Methyl-1-octanol         | 0.029471 | 0.54137  | 0.856349 |
| <i>Paludibaculum</i>               | 2-methyl-1-Propanol        | 0.029522 | 0.54137  | 0.856222 |
| <i>Solirubrobacter</i>             | 6-Methyl-1-octanol         | 0.030375 | 0.543486 | 0.854106 |
| <i>Porphyromonas</i>               | 1-Hexacosanol              | 0.030438 | 0.543486 | 0.85395  |

|                                   |                                 |          |          |          |
|-----------------------------------|---------------------------------|----------|----------|----------|
| <i>Porphyromonas</i>              | 1-Triacontanol                  | 0.033271 | 0.586354 | 0.847121 |
| <i>Thauera</i>                    | Phenylethyl Alcohol             | 0.033844 | 0.588801 | 0.845774 |
| <i>Filifactor</i>                 | 2-(2-butoxyethoxy)-Ethanol      | 0.03523  | 0.60515  | 0.84256  |
| <i>Enhydrobacter</i>              | 2-Isopropyl-5-methyl-1-heptanol | 0.037256 | 0.631956 | -0.83796 |
| <i>Moraxella</i>                  | 6-Methyl-1-octanol              | 0.037841 | 0.633953 | 0.83666  |
| <i>Bifidobacterium</i>            | Phenylethyl Alcohol             | 0.039383 | 0.651741 | 0.833265 |
| <i>Achromobacter</i>              | 2-ethyl-1-Hexanol               | 0.042286 | 0.691356 | -0.82704 |
| <i>Thauera</i>                    | 2-methyl-1-Propanol             | 0.046158 | 0.745667 | 0.819038 |
| <i>norank_p__Saccharibacteria</i> | 2-ethyl-2-methyl-Tridecanol     | 0.047204 | 0.753594 | 0.816931 |
| <i>Enhydrobacter</i>              | 9,12-Octadecadien-1-ol          | 0.048431 | 0.764194 | -0.81449 |

---
